1 **Suberoyl bis-hydroxamic acid reactivates Kaposi's sarcoma-associated herpesvirus**  
2 **through histone acetylation and induces apoptosis in lymphoma cells**

3

4 Shun Iida<sup>a,b</sup>, Sohtaro Mine<sup>a\*</sup>, Keiji Ueda<sup>c</sup>, Tadaki Suzuki<sup>a</sup>, Hideki Hasegawa<sup>a,b</sup>,  
5 Harutaka Katano<sup>a#</sup>

6

7 a Department of Pathology, National Institute of Infectious Diseases, Shinjuku, Tokyo,  
8 Japan

9 b Division of Infectious Diseases Pathology, Department of Global Infectious Diseases,  
10 Tohoku University Graduate School of Medicine, Sendai, Miyagi, Japan

11 c Division of Virology, Department of Microbiology and Immunology, Osaka  
12 University Graduate School of Medicine, Osaka, Japan

13

14 Running title: SBHA reactivates KSHV in PEL cells

15

16 # Address correspondence to Harutaka Katano, [katano@nih.go.jp](mailto:katano@nih.go.jp)

17 \*Present address: Laboratory of Infectious Diseases, National Institute of Allergy and  
18 Infectious Diseases, National Institutes of Health, Bethesda, Maryland, USA

19

20 Word counts: abstract - 223; text - 2,143.

21

22 Abstract

23 Kaposi's sarcoma-associated herpesvirus (KSHV) is an etiologic agent of Kaposi's  
24 sarcoma as well as primary effusion lymphoma (PEL), an aggressive B-cell neoplasm  
25 which mostly arises in immunocompromised individuals. At present, there is no specific  
26 treatment available for PEL and its prognosis is poor. Lytic replication of KSHV is also  
27 associated with a subset of multicentric Castleman diseases. In this study, we found that  
28 the histone deacetylase inhibitor suberoyl bis-hydroxamic acid (SBHA) induced KSHV  
29 reactivation in PEL cells in a dose-dependent manner. Next-generation sequencing  
30 analysis showed that more than 40% of all transcripts expressed in SBHA-treated PEL  
31 cells originated from the KSHV genome compared with less than 1% in untreated cells.  
32 Chromatin immunoprecipitation assays demonstrated that SBHA induced histone  
33 acetylation targeting the promoter region of the KSHV replication and transcription  
34 activator gene. However, there was no significant change in methylation status of the  
35 promoter region of this gene. In addition to its effect of KSHV reactivation, this study  
36 revealed that SBHA induces apoptosis in PEL cells in a dose-dependent manner,  
37 inducing cleavage of caspases and expression of proapoptotic factors, including Bim  
38 and Bax. These findings suggest that SBHA reactivates KSHV from latency and induces  
39 apoptosis through the mitochondrial pathway in PEL cells. Therefore, SBHA can be  
40 considered a new tool for induction of KSHV reactivation, and could provide a novel  
41 therapeutic strategy against PEL.

42 Importance

43 Kaposi's sarcoma and primary effusion lymphoma cells are latently infected with  
44 Kaposi's sarcoma-associated herpesvirus (KSHV), whereas KSHV replication is  
45 frequently observed in multicentric Castleman disease. Although KSHV replication can

46 be induced by some chemical reagents (e.g. 12-*O*-tetradecanoylphorbol-13-acetate), the  
47 mechanism of KSHV replication is not fully understood. We found that the histone  
48 deacetylase inhibitor suberoyl bis-hydroxamic acid (SBHA) induced KSHV reactivation  
49 with high efficiency, through histone acetylation in the promoter of the replication and  
50 transcription activator gene, compared with 12-*O*-tetradecanoylphorbol-13-acetate.  
51 SBHA also induced apoptosis through the mitochondrial pathway in KSHV-infected  
52 cells, with a lower EC<sub>50</sub> than measured for viral reactivation. SBHA could be used in a  
53 highly efficient replication system for KSHV *in vitro*, and as a tool to reveal the  
54 mechanism of replication and pathogenesis of KSHV. The ability of SBHA to induce  
55 apoptosis at lower levels than needed to stimulate KSHV reactivation, indicates its  
56 therapeutic potential.

57

58 Introduction

59 Kaposi's sarcoma-associated herpesvirus (KSHV, also known as human herpesvirus-8,  
60 HHV-8) is a member of gamma herpesvirus, first discovered in AIDS-associated  
61 Kaposi's sarcoma (1). KSHV has also been identified as an etiologic agent of several  
62 lymphoproliferative disorders, including primary effusion lymphoma (PEL) and  
63 multicentric Castleman disease (2, 3). Similar to other herpesviruses, the life cycle of  
64 KSHV consists of two distinct phases; latent and lytic infection (4). Various  
65 environmental and physiological factors trigger KSHV reactivation from latency. For  
66 instance, hypoxia and reactive oxygen species have been shown to induce lytic infection  
67 (5, 6). The lytic phase is also inducible *in vitro* by some chemical reagents including  
68 12-*O*-tetradecanoylphorbol-13-acetate (TPA) and histone deacetylase (HDAC)  
69 inhibitors (7, 8).

70 PEL is an aggressive B-cell lymphoma which usually presents as serous effusions  
71 without solid mass formation, arising in body cavities, such as the pleural, pericardial or  
72 peritoneal cavities (9). Most cases occur in immunocompromised individuals, such as  
73 patients with AIDS, severe immunodeficiency, or recipients of solid organ  
74 transplantation (9). Currently, no specific treatment is available for PEL and its  
75 prognosis is unfavorable (10). The median survival of PEL patients was 6.2 months  
76 under a combination of CHOP (cyclophosphamide, doxorubicin, vincristine and  
77 prednisone)-like regimen and anti-retroviral therapy, which is typically administered  
78 for AIDS-related PEL patients (11).

79 HDAC inhibitors are a class of chemical compounds which exhibit various anti-tumor  
80 effects, including apoptosis, growth arrest, differentiation and autophagy (12). However,  
81 the mechanism of action is complex, as HDAC inhibitors affect gene expression profile

82 through induction of histone acetylation (12). To date, four HDAC inhibitors have been  
83 approved by the United States Food and Drug Administration (FDA) for treatment of  
84 hematologic malignancies, although none of these are clinically available for PEL  
85 treatment (13).

86 In a previous study, we reported that suberoyl bis-hydroxamic acid (SBHA), a HDAC  
87 inhibitor, strongly induced KSHV lytic infection and decreased cell viability in a PEL  
88 cell line (14). However, the mechanisms underlying these effects have yet to be  
89 elucidated. In this study, we demonstrate that SBHA induced histone acetylation on the  
90 promoter region of the replication and transcription activator (RTA) gene of KSHV,  
91 resulting in KSHV reactivation. We also found that SBHA induced apoptosis of PEL  
92 cell lines through the mitochondrial pathway.

93

## 94 Results

### 95 **SBHA reactivated KSHV from latency**

96 To investigate the effect of SBHA on KSHV reactivation, two rKSHV.219-infected  
97 Burkitt lymphoma cell lines (BJAB.219 and Raji.219), were exposed to various  
98 concentrations of SBHA and analyzed by flow cytometry. rKSHV.219 is a recombinant  
99 KSHV which expresses red fluorescent protein (RFP) from the KSHV lytic PAN  
100 promoter and green fluorescent protein (GFP) from the EF-1a promoter (15). The  
101 analysis revealed that SBHA reactivated rKSHV.219 from latency in a dose-dependent  
102 manner (Figs. 1A and 1B). Each half maximal effective concentration ( $EC_{50}$ ) for  
103 rKSHV.219 reactivation in BJAB.219 and Raji.219 cells was calculated as  $2.95 \times 10^{-5}$  M  
104 and  $2.71 \times 10^{-5}$  M, respectively (Fig. 1B). To examine whether SBHA induce KSHV  
105 reactivation in PEL cells, expression of KSHV-encoded mRNA was determined by

106 real-time reverse transcription (RT)-PCR and protein levels was assessed by western  
107 blot. Real-time RT-PCR analysis showed that the mRNA levels of two KSHV lytic  
108 genes, RTA and viral interleukin-6 (vIL-6), were higher in SBHA-treated PEL cells than  
109 in those treated with TPA or other HDAC inhibitors (Fig. 1C). Furthermore, western  
110 blot analysis demonstrated that SBHA induced expression of RTA and vIL-6 proteins  
111 more than TPA and other HDAC inhibitors in PEL cell lines (Fig. 1D). These data  
112 indicate that SBHA strongly induces KSHV lytic infection in B-cells, including PEL  
113 cells.

114

#### 115 **SBHA dramatically altered the gene expression profile of KSHV-infected PEL cells**

116 Real-time PCR array was carried out on KSHV gene products, to evaluate the effect of  
117 SBHA on KSHV gene expression. KSHV real-time PCR array revealed the global  
118 activation of KSHV gene transcription in SBHA-treated PEL cells (Fig. 2 and  
119 supplementary Fig. 1). SBHA increased almost all KSHV gene transcripts in three  
120 different PEL cell lines, although the pattern and degree of change was very different  
121 between cell lines.

122 Next, KSHV transcriptome analysis by next-generation sequencing was performed. As  
123 shown in Table 1, less than 1% of total reads were mapped to KSHV genome in  
124 untreated BCBL-1 and SPEL cells, and approximately 3% were mapped to KSHV  
125 genome in TPA-treated cells. In contrast, more than 40% of total reads originated from  
126 KSHV in SBHA-treated PEL cells (Table 1). Ring images of read coverage  
127 demonstrated the differences in KSHV gene expression between untreated (dimethyl  
128 sulfoxide (DMSO) only), TPA-, and SBHA-stimulated cells (Fig. 3A and supplementary  
129 Fig. 2A). The number of KSHV-mapped reads were dramatically increased by SBHA

130 stimulation which increased expression of almost all lytic genes including vIL-6 (K2),  
131 K4, ORF45, ORF46, ORF59 and ORF65 (Fig. 3A and supplementary Fig. 2A). Notably,  
132 expression of viral interferon regulatory factors (vIRF) (including K9 (vIRF1), K10  
133 (vIRF4), K10.5 (vIRF3) and K11 (vIRF2)) and latent genes (including K12, ORF71,  
134 ORF72 and ORF73) decreased after SBHA treatment (Fig. 3B and supplementary Fig.  
135 2B). Taken together, these data show that SBHA intensely induces transcription of  
136 KSHV lytic genes and modifies the gene expression profile in PEL cells.

137

### 138 **SBHA altered histone modification but not CpG methylation of promoters of** 139 **KSHV lytic genes**

140 PEL cells were treated with TPA or SBHA for 12 hours and histone modification of the  
141 KSHV lytic gene promoter was analyzed. Chromatin immunoprecipitation (ChIP) assay  
142 revealed that activating histone modifications, acetyl-histone H3 (AcH3) and  
143 acetyl-histone H4 (AcH4), on RTA and vIL-6 promoters were strongly induced by  
144 SBHA, while minimal change was induced by TPA (Figs. 4A and 4B). The level of  
145 another activating histone mark, H3K4me3, was increased by SBHA in TY-1 and by  
146 TPA in BCBL-1. In contrast, repressive histone mark, H3K27me3, was reduced by  
147 SBHA in SPEL (Figs. 4A and 4B).

148 The methylation pattern of the RTA promoter was also investigated, since HDAC  
149 inhibitors reverse CpG methylation (16). Bisulfite sequencing analysis revealed that no  
150 or only a few CpG sites were methylated at the RTA promoter in PEL cells, regardless  
151 of SBHA or TPA treatment (Fig. 4C).

152 Taken together, these results indicate that reactivation of KSHV by SBHA is mainly  
153 associated with an alteration of histone modifications in the promoter of KSHV lytic

154 genes.

155

### 156 **SBHA induced apoptosis and inhibited growth of PEL cells**

157 Next, the effect of SBHA on cell growth was investigated. SBHA consistently decreased  
158 viability of PEL cell lines compared with TPA and other drugs, following 48 hours of  
159 drug treatment, demonstrated by trypan blue stains (Fig. 5A). Notably, SBHA inhibited  
160 the growth of PEL cells in a dose-dependent manner (Fig. 5B). The growth-inhibitory  
161 effects of SBHA were confirmed by XTT assay with similar results to trypan blue stain  
162 data (Figs. 5C and 5D). Each half maximal inhibitory concentration (IC<sub>50</sub>) for cell  
163 growth inhibition by SBHA in BCBL-1, SPEL and TY-1 cells was calculated between  
164 2.40–5.20×10<sup>-6</sup> M (Figs. 5D and 5E). The growth of Burkitt lymphoma cells (BJAB and  
165 Raji) and their recombinant KSHV-infected derivatives (BJAB.219 and Raji.219) was  
166 also inhibited by SBHA in a dose-dependent manner. However, each associated IC<sub>50</sub>  
167 was higher than found in PEL cell lines (Fig 5E). Finally, Annexin V assays  
168 demonstrated that SBHA induced apoptosis in PEL cells in a dose-dependent manner  
169 (Figs. 5F and 5G). These data suggest that SBHA inhibits the growth of PEL cells by  
170 inducing apoptosis.

171

### 172 **SBHA triggered intrinsic pathway of apoptosis**

173 The effect of SBHA on apoptosis-related factors was investigated. Western blot analysis  
174 demonstrated that expression of proapoptotic factors of the Bcl-2 family, including Bim  
175 and Bax, were upregulated by SBHA in PEL cells (Fig. 6). The cleavage of caspases  
176 downstream of Bim and Bax, including caspase-3, caspase-7 and caspase-9 was also  
177 stimulated (Fig. 6). Furthermore, SBHA downregulated Bcl-xL, an antiapoptotic factor



178 from the Bcl-2 family. These data suggest that SBHA induces apoptosis through the  
179 mitochondrial pathway in PEL cells.

180

### 181 **SBHA did not stimulate Notch1 signaling pathway in PEL cells**

182 SBHA stimulates cleavage of the full-length Notch1 protein, leading to release of the  
183 active form of Notch1, Notch1 intracellular domain (NICD), in thyroid carcinoma and  
184 neuroendocrine tumors (17-21). However, such an activation of the Notch1 signaling  
185 pathway by SBHA in PEL cells was not detected by western blot analysis (Fig. 7).

186

### 187 Discussion

188 HDAC inhibitors are a group of chemical compounds which exhibit anti-tumor effects.  
189 Since suberoylanilide hydroxamic acid (SAHA, also known as vorinostat) was first  
190 approved for clinical use, four HDAC inhibitors have been approved by FDA for  
191 hematologic malignancies (13). SBHA, an analogue of SAHA, has been proven to  
192 demonstrate anti-tumor effects *in vitro* in various types of tumors including lung, breast  
193 and thyroid carcinomas, melanoma, acute leukemia, and myeloma (17-25). We  
194 previously showed that SBHA robustly decreased viability of SPEL cells compared with  
195 other HDAC inhibitors. To the best of our knowledge, this was the first report showing  
196 an anti-tumor effect of SBHA against a virus-associated malignancy (14). Here we  
197 demonstrate that SBHA induces apoptosis in PEL cells through the mitochondrial  
198 pathway of apoptosis and reactivates KSHV from latency by altering histone  
199 modification in the promoter region of KSHV lytic genes.

200 The mechanism underlying anti-tumor effect by SBHA is not yet fully understood.

201 However, two signaling pathways have been linked to SBHA; Notch signaling and the

202 mitochondrial pathway of apoptosis. Notch signaling is an evolutionally conserved  
203 signaling pathway which plays a crucial role in diverse developmental and  
204 physiological processes as well as tumorigenesis (26). Notch signaling is also important  
205 for pathogenesis of KSHV-associated malignancies as it induces proliferation of PEL  
206 cells and reactivation of KSHV (27, 28). Several reports have demonstrated that SBHA  
207 exhibited anti-tumor activity in neuroendocrine tumors, such as carcinoid tumor,  
208 pheochromocytoma and thyroid carcinoma, through upregulation of Notch1 signaling  
209 (17-21). However, in this study, SBHA did not activate Notch1 in PEL cells, even  
210 though trace levels of inactive Notch1 protein were detectable by western blot (Fig. 7).  
211 This variation in response to SBHA may be due to the difference in cell type or KSHV  
212 infection. In contrast to Notch signaling, the mitochondrial pathway of apoptosis is  
213 activated by SHBA in PEL cells (Fig. 6). This effect is likely based on transcriptional  
214 regulation mediated by SBHA, since expression of the proapoptotic factors Bim and  
215 Bad was upregulated. In addition, the anti-apoptotic factor Bcl-xL was downregulated  
216 by SHBA and this result accords with the hypothesis that SBHA might downregulate  
217 antiapoptotic factors through upregulating miRNAs (29). Moreover, similar  
218 upregulation of Bim and downregulation of Bcl-xL has been observed in melanoma,  
219 suggesting that activation of the mitochondrial pathway of apoptosis is the major  
220 mechanism underlying anti-tumor effect by SBHA (22).

221 SBHA induced histone acetylation on promoter of KSHV lytic genes, although no  
222 significant change was observed in CpG methylation of RTA promoter (Fig. 4). At  
223 present, two different groups have reported on the methylation pattern of RTA promoter,  
224 with opposite results. Chen et al. reported that CpG sites in the RTA promoter are highly  
225 methylated in BCBL-1 cells during latent infection, and that demethylation is induced

226 by TPA treatment (30). However, Günther et al. conclude that the RTA promoter is  
227 highly methylated in HBL6 cells, but very little methylation is observed in BCBL-1 and  
228 AP3 cells in the latent phase (31). These contrasting results suggest that CpG  
229 methylation of the RTA promoter is not a key regulator for maintaining KSHV latency.  
230 In general, lytic replication of herpesvirus leads host cell death (32). Therefore, a  
231 combination of antiviral drugs with certain drugs or stimuli which reactivate herpesvirus  
232 is regarded as a potent therapeutic tool for herpesvirus-associated malignancies; a  
233 strategy called lytic induction therapy (33). In the present study, we demonstrated that  
234 SBHA not only reactivates KSHV, but also initiates the mitochondrial pathway of  
235 apoptosis (Fig. 1 and Fig. 6). Importantly, each  $IC_{50}$  for cell growth inhibition in PEL  
236 cells ( $2.40 \times 10^{-6}$ – $5.20 \times 10^{-6}$  M, Fig. 5E) is lower than the  $EC_{50}$  for KSHV reactivation  
237 ( $2.71 \times 10^{-5}$ – $2.95 \times 10^{-5}$  M, Fig. 1B). This suggests that the cytotoxicity of SBHA to PEL  
238 cells principally depends on the direct activation of the mitochondrial pathway of  
239 apoptosis, rather than reactivation of KSHV (Fig. 8).  
240 The effect of SBHA on gene expression in KSHV-infected cells was striking in that  
241 more than 40% of total transcripts expressed in SBHA-treated PEL cells were KSHV  
242 origin (Table 1). It is noteworthy that expression of vIRF genes was decreased after  
243 SBHA treatment (Fig. 3B and supplementary Fig. 2B). vIRFs interact with cellular  
244 proteins and interfere with gene transcription and signaling pathways associated with  
245 various cellular functions, such as cell death, cell cycle regulation, proliferation, and the  
246 immune response (34). According to a previous report by Muñoz-Fontela et al., vIRF3  
247 inhibited activation of the Bim promoter by the FOXO3a transcription factor (35).  
248 Therefore, downregulation of vIRF3 transcription by SBHA may contribute to induction  
249 of Bim expression (Fig. 6).

250 In this study, there is little investigation into the effect of SBHA on host gene expression,  
251 including miRNAs that could contribute to the establishment of KSHV infection or  
252 tumorigenesis of KSHV-associated malignancies. However, the findings presented here  
253 provide new insight into the pathophysiology of PEL. In light of these results, SBHA  
254 should be considered a novel therapeutic strategy against PEL.

255

256 Materials and Methods

257 **Cell culture and drug treatment**

258 KSHV-positive PEL cell lines (BCBL-1, SPEL and TY-1), Burkitt lymphoma cell lines  
259 (BJAB and Raji) and T-cell leukemia cell lines (Jurkat and MOLT-4) were grown in  
260 RPMI 1640 medium supplemented with 10% fetal bovine serum at 37°C with 5% CO<sub>2</sub>.  
261 KSHV-infected Burkitt lymphoma cell lines (BJAB.219 and Raji.219) were established  
262 as reported previously (36): BJAB and Raji cells were infected with rKSHV.219 (kindly  
263 provided by Dr. Jeffrey Vieira, Washington University) at multiplicities of infection of  
264 0.1 and selected in RPMI 1640 medium containing 5 µg/mL puromycin. Selected cells  
265 were maintained under the condition with 0.5 µg/mL puromycin. BJAB.219 and  
266 Raji.219 were positive for GFP expression, and KSHV genome was detected in both  
267 cells by PCR after more than 10 passages. Raji.219 is also positive for Epstein-Barr  
268 virus (EBV).

269 Cells were treated with TPA (Sigma-Aldrich, St Louis, MO) or one of the HDAC  
270 inhibitors; panobinostat (Sigma-Aldrich), SBHA (Sigma-Aldrich), CI-994  
271 (Sigma-Aldrich) and sodium butyrate (Sigma-Aldrich). All reagents above were  
272 dissolved in DMSO as ×1,000 stock solution. The final concentration used for each drug  
273 was the following unless otherwise noted: 20 ng/mL for TPA, 3.6 nM for Pano, 10 µM  
274 for SBHA, 100 nM for CI-994 and 1.25 µM for NaB. Viability of cells were measured  
275 by TC10 automated cell counter (Bio-Rad, Hercules, CA) with trypan blue stain.

276

277 **Flow cytometry**

278 To detect reactivation of KSHV by flow cytometry, red fluorescence was measured in  
279 rKSHV.219-infected cells, as reported previously (15). rKSHV.219-infected Burkitt

280 lymphoma cell lines, BJAB.219 and Raji.219, were seeded at densities of  $2.5 \times 10^5$   
281 cells/mL and incubated with SBHA at various concentrations for 36 hours. Cells were  
282 washed twice with phosphate-buffered saline (PBS) and then analyzed by CyFlow SL  
283 flow cytometer (Partec, Görlitz, Germany). Data were analyzed using FlowJo software  
284 (FlowJo, Ashland, OR).

285

### 286 **RNA isolation and real-time RT-PCR**

287 Total RNA was extracted from cultured cells using RNeasy Mini Kit (Qiagen, Hilden,  
288 Germany) following the manufacture's protocol and subsequently treated with TURBO  
289 DNase (Thermo Fisher Scientific, Waltham, MA). RNA samples were subjected to  
290 TaqMan-based real-time RT-PCR analysis to detect the mRNA of RTA, vIL-6 and  
291 glyceraldehyde-3-phosphate dehydrogenase (GAPDH) using QuantiTect Multiplex  
292 RT-PCR Kits (Qiagen) as described previously (37, 38).

293

### 294 **Western blot analysis**

295 Protein extraction and immunoblotting were performed as described previously, with  
296 some modifications (39). Briefly,  $1 \times 10^6$  cells were lysed in 50  $\mu$ L of M-PER  
297 Mammalian Protein Extraction Reagent (Thermo Fisher Scientific). Subsequently, 7.5  
298  $\mu$ g per lane of total protein samples were separated on 4-12% Bolt Bis-Tris Plus Gels  
299 and blotted onto polyvinylidene difluoride membrane (Bio-Rad) using the Trans-Blot  
300 Turbo Transfer System (Bio-Rad). The membranes were blocked with Block Ace  
301 solution (KAC, Kyoto, Japan) and probed with primary antibodies followed by  
302 horseradish peroxidase-conjugated anti-mouse or anti-rabbit secondary antibodies  
303 diluted with immunoreaction enhancer solution (Can Get Signal, Toyobo, Osaka, Japan).

304 Blots were visualized by SuperSignal West Dura Extended Duration Substrate (Thermo  
305 Fisher Scientific) and signals were detected with LAS-3000 imaging system (Fujifilm,  
306 Tokyo, Japan).

307 The following antibodies were used in western blotting: GAPDH (sc-25778) was  
308 obtained from Santa Cruz Biotechnology (Dallas, TX). Bim (ab32158) was from Abcam  
309 (Cambridge, UK). Cleaved caspase-3 (Asp175, #9661), caspase-7 (#9492), caspase-9  
310 (#9502), Bcl-xL (2764), Notch1 (#3608) and cleaved Notch1 (Val1744, #4147) were  
311 from Cell Signaling Technology (Danvers, MA). Apoptosis I Sampler Kit (for Bad, Bax  
312 and Bcl-2) and Apoptosis Sampler Kit II (for caspase-2 and caspase-3) were from BD  
313 Transduction Laboratories (Franklin Lakes, NJ). The mouse monoclonal antibody  
314 against RTA (40) and rabbit polyclonal antibodies against latency-associated nuclear  
315 antigen 1 (LANA-1) (41) and vIL-6 (42) were generated as previously described.

316

### 317 **KSHV real-time PCR array**

318 To determine expression profiles of KSHV gene transcripts, we used KSHV real-time  
319 PCR array, a TaqMan-based real-time RT-PCR system which can detect all 87 KSHV  
320 gene transcripts simultaneously (39). RNA samples were obtained from BCBL-1, SPEL  
321 and TY-1 cells cultured with or without SBHA for 48 hours, following the procedure of  
322 RNA preparation described above. Subsequently, RNA samples were subjected to  
323 KSHV real-time PCR array using the QuantiTect Probe RT-PCR Kit (Qiagen). The copy  
324 number of each transcripts was normalized to that of GAPDH transcripts and the ratio  
325 of treated versus untreated cells was calculated.

326

### 327 **KSHV transcriptome analysis**

328 BCBL-1 and SPEL cells were seeded at density of  $1 \times 10^5$  cells/mL and were stimulated  
329 with TPA or SBHA for 36 hours. Total RNA was extracted from the cells using  
330 ISOGEN (Nippon Gene, Tokyo, Japan) and then mRNA was purified from total RNA  
331 by Oligotex -dT30 Super mRNA Purification Kit (Takara Bio, Kusatsu, Japan). Double  
332 stranded cDNA was prepared from 1  $\mu$ g of each mRNA sample using the PrimeScript  
333 Double Strand cDNA Synthesis Kit (Takara) and a cDNA library was established with  
334 Ligation Sequencing Kit (SQK-LSK109, Oxford Nanopore Technologies, Oxford, UK)  
335 according to the manufacturer's instructions. Barcoded samples were pooled and ligated  
336 to sequencing adaptor. Sequencing was performed with MinION device using R9.4.1  
337 flow cell (Oxford Nanopore Technologies).

338

### 339 **Bioinformatics**

340 Guppy Version 3.6.0 was used for basecalling. Fastq files were mapped to KSHV  
341 genome (GenBank accession no. AP017458 for SPEL, and NC\_003409 for BCBL-1) by  
342 CLC Genome Workbench (version 14, Qiagen), and the coverage data were obtained  
343 using Integrative Genomics Viewer (version 2.50,  
344 <http://software.broadinstitute.org/software/igv/home>). Ring image of the coverage was  
345 established with BLAST Ring Image Generator (version 0.95,  
346 <http://brig.sourceforge.net/>).

347

### 348 **ChIP assay**

349 BCBL-1, SPEL and TY-1 cells were seeded at density of  $5.0 \times 10^5$  cells/mL with TPA or  
350 SBHA. After 12 hours of incubation, cells were treated with 1% formaldehyde to  
351 crosslink protein and DNA, and then unreacted formaldehyde were quenched with 0.15



352 M glycine. Subsequently, cells were washed three times with PBS and lysed in SDS  
353 lysis buffer (50 mM Tris-HCl, pH 8.0, 10 mM EDTA, pH 8.0, 1% SDS). Cell lysates  
354 were sonicated using Bioruptor II (Cosmo Bio, Tokyo, Japan) to shear crosslinked DNA  
355 to approximately 200–700 base pairs in length. Chromatin samples derived from  
356  $1.0 \times 10^6$  cells were precleared with protein G sepharose (GE Healthcare, Chicago, IL)  
357 and then 1–5  $\mu$ g of each antibody was added to form immune complex. After overnight  
358 incubation, immune complexes were precipitated with protein G sepharose and  
359 sequentially washed with low salt immune complex wash buffer (0.1% SDS, 1% Triton  
360 X-100, 2 mM EDTA, pH 8.0, 20 mM Tris-HCl, pH 8.0, 150 mM NaCl), high salt  
361 immune complex wash buffer (0.1% SDS, 1% Triton X-100, 2 mM EDTA, pH 8.0, 20  
362 mM Tris-HCl, pH 8.0, 500 mM NaCl), LiCl immune complex wash buffer (250 mM  
363 LiCl, 1% NP-40, 1% sodium deoxycholate, 1 mM EDTA, pH 8.0, 10 mM Tris-HCl, pH  
364 8.0) and TE buffer. Finally, protein/DNA complexes were eluted with elution buffer (1%  
365 SDS, 100 mM  $\text{NaHCO}_3$ ), incubated with 0.2 M NaCl at 65°C overnight to reverse  
366 crosslink, and then treated with RNase A and proteinase K. For preparation of input  
367 DNA, chromatin samples from  $1.0 \times 10^4$  cells were sequentially treated with 0.2 M NaCl,  
368 RNase A and proteinase K. All DNA samples were subjected to real-time PCR analysis  
369 using QuantiTect SYBR Green PCR Kit (Qiagen) with primers shown below.  
370 The following antibodies were used for chromatin immunoprecipitation: Normal rabbit  
371 IgG (PM035) was obtained from Medical & Biological Laboratories (Nagoya, Japan).  
372 Acetyl-histone H3 (#06-599), acetyl-histone H4 (#06-866), trimethyl-histone H3 (Lys4,  
373 #04-745) and trimethyl-histone H3 (Lys27, #07-449) were from Millipore (Burlington,  
374 MA). The sequences of the primers were as follows: RTA promoter, forward primer  
375 5'-GGTACCGAATGCCACAATCTGTGCCCT-3', reverse primer

376 5'-ATGGTTTGTGGCTGCCTGGACAGTATTC-3' (43); vIL-6 promoter, forward  
377 primer 5'-GCGCCTCCCGGTACAAGTCC-3', reverse primer  
378 5'-GACCATTGGCGGGTAGAATC-3' (44).

379

### 380 **Bisulfite sequencing**

381 BCBL-1, SPEL and TY-1 cells were cultured with TPA or SBHA for 24 hours. DNA  
382 samples were prepared from the cells using DNeasy Blood & Tissue Kit (Qiagen).  
383 Before bisulfite conversion, 5 µg of each DNA sample was digested with EcoRI.  
384 Digested DNA was denatured in 0.3 M NaOH and subjected to bisulfite conversion with  
385 4.0 M sodium bisulfite/0.4 mM hydroquinone (pH 5.0) at 55°C for three hours.  
386 Bisulfite-converted DNA was sequentially treated with 0.3 M NaOH and 0.45 M  
387 ammonium acetate for deamination and desulfonation, respectively. Purified DNA was  
388 subjected to PCR to amplify the promoter region of the RTA gene using KOD -Multi &  
389 Epi- enzyme (Toyobo, Osaka, Japan) with the following primers: forward primer  
390 5'-GTGTTTTATTATTTTATAG-3', reverse primer  
391 5'-CATCTAACATAACTTTAATC-3' (31). PCR products were cloned into the pCR2.1  
392 vector using the TA Cloning Kit (Invitrogen, Carlsbad, CA) to isolate single clones. The  
393 DNA sequence of each clone was determined by Sanger sequencing using M13 forward  
394 and reverse primers.

395

### 396 **XTT assay**

397 XTT assays were performed using Cell Proliferation Kit II (XTT) (Roche Diagnostics,  
398 Mannheim, Germany) following manufacturer's protocol. Briefly, cells were seeded  
399 into 96-well plates at a density of  $1 \times 10^5$  cells/mL with TPA or a HDAC inhibitor. After

400 48 hours of culture, XTT labeling mixture was added to each well. Following a further  
401 four hours incubation, absorbance at 450 nm was measured by iMARK microplate  
402 reader (Bio-Rad).

403

#### 404 **Annexin V assay**

405 Annexin V assay was carried out using MEBCYTO Apoptosis Kit (Annexin V-FITC  
406 Kit) (Medical & Biological Laboratories) according to manufacturer's instructions. In  
407 brief, cells were seeded at density of  $5.0 \times 10^5$  cells/mL and incubated with various  
408 concentration of SBHA for 24 hours to induce apoptosis. After washing with PBS, the  
409 cells were stained by fluorescein isothiocyanate (FITC) labeled annexin V and  
410 propidium iodide (PI). Finally, cells were analyzed by a flow cytometer as described  
411 above.

412

#### 413 **Data analysis**

414 Generation of dose-response curves, and calculation of  $EC_{50}$  and  $IC_{50}$  were carried out  
415 using GraphPad Prism 8.3.0 software (GraphPad Software, San Diego, CA). Data  
416 obtained from KSHV real-time PCR arrays were analyzed using Cluster 3.0 software  
417 (45) and heatmaps were generated using Java Treeview software (46).

418

#### 419 **Accession numbers**

420 The sequence reads by NGS in this study were registered in Sequence Read Archive  
421 database as accession number DRA010668 in the DNA Data Bank of Japan Sequence  
422 Read Archive.

423

424 **Acknowledgments**

425 The authors thank Dr. Jeffrey Vieira, Department of Laboratory Medicine, University of  
426 Washington, for providing the recombinant KSHV. This work was partly supported by  
427 the Japan Society for the Promotion of Science (grant no. 19K07600 to HK), and Japan  
428 Agency for Medical Research and Development (AMED, no. JP20fk0410016 to HK  
429 and JP20fk0108104 to TS and HK).

430

431 **Competing interests**

432 The authors have declared that no competing interests exist.

433

434 **References**

- 435 1. Chang Y, Cesarman E, Pessin MS, Lee F, Culpepper J, Knowles DM, Moore PS.  
436 1994. Identification of herpesvirus-like DNA sequences in AIDS-associated  
437 Kaposi's sarcoma. *Science*. **266**:1865-1869.
- 438 2. Cesarman E, Chang Y, Moore PS, Said JW, Knowles DM. 1995. Kaposi's  
439 sarcoma-associated herpesvirus-like DNA sequences in AIDS-related  
440 body-cavity-based lymphomas. *N Engl J Med*. **332**:1186-1191.
- 441 3. Soulier J, Grollet L, Oksenhendler E, Cacoub P, Cazals-Hatem D, Babinet P,  
442 d'Agay MF, Clauvel JP, Raphael M, Degos L, et al. 1995. Kaposi's  
443 sarcoma-associated herpesvirus-like DNA sequences in multicentric Castleman's  
444 disease. *Blood*. **86**:1276-1280.
- 445 4. Ye F, Lei X, Gao SJ. 2011. Mechanisms of Kaposi's Sarcoma-Associated  
446 Herpesvirus Latency and Reactivation. *Adv Virol*. **2011**.
- 447 5. Davis DA, Rinderknecht AS, Zoetewij JP, Aoki Y, Read-Connole EL, Tosato G,

- 448           Blauvelt A, Yarchoan R. 2001. Hypoxia induces lytic replication of Kaposi  
449           sarcoma-associated herpesvirus. *Blood*. **97**:3244-3250.
- 450   6.       Ye F, Zhou F, Bedolla RG, Jones T, Lei X, Kang T, Guadalupe M, Gao SJ. 2011.  
451           Reactive oxygen species hydrogen peroxide mediates Kaposi's  
452           sarcoma-associated herpesvirus reactivation from latency. *PLoS Pathog*.  
453           **7**:e1002054.
- 454   7.       Renne R, Zhong W, Herndier B, McGrath M, Abbey N, Kedes D, Ganem D.  
455           1996. Lytic growth of Kaposi's sarcoma-associated herpesvirus (human  
456           herpesvirus 8) in culture. *Nat Med*. **2**:342-346.
- 457   8.       Lu F, Day L, Gao SJ, Lieberman PM. 2006. Acetylation of the  
458           latency-associated nuclear antigen regulates repression of Kaposi's  
459           sarcoma-associated herpesvirus lytic transcription. *J Virol*. **80**:5273-5282.
- 460   9.       Said J, Cesarman E. 2017. Primary effusion lymphoma, p. 323-324. In S. H. Swerdlow, E.  
461           Campo, N. L. Harris, E. S. Jaffe, S. A. Pileri, H. Stein, and J. Thiele (ed.), WHO Classification of  
462           Tumours of Haematopoietic and Lymphoid Tissues, Revised 4th ed. International Agency for  
463           Research on Cancer (IARC), Lyon.
- 464   10.      Simonelli C, Spina M, Cinelli R, Talamini R, Tedeschi R, Gloghini A, Vaccher E,  
465           Carbone A, Tirelli U. 2003. Clinical features and outcome of primary effusion  
466           lymphoma in HIV-infected patients: a single-institution study. *J Clin Oncol*.  
467           **21**:3948-3954.
- 468   11.      Boulanger E, Gerard L, Gabarre J, Molina JM, Rapp C, Abino JF, Cadranel J,  
469           Chevret S, Oksenhendler E. 2005. Prognostic factors and outcome of human  
470           herpesvirus 8-associated primary effusion lymphoma in patients with AIDS. *J*  
471           *Clin Oncol*. **23**:4372-4380.

- 472 12. Chueh AC, Tse JW, Togel L, Mariadason JM. 2015. Mechanisms of Histone  
473 Deacetylase Inhibitor-Regulated Gene Expression in Cancer Cells. *Antioxid*  
474 *Redox Signal.* **23**:66-84.
- 475 13. Wang X, Waschke BC, Woolaver RA, Chen Z, Zhang G, Piscopio AD, Liu X,  
476 Wang JH. 2019. Histone Deacetylase Inhibition Sensitizes PD1  
477 Blockade-Resistant B-cell Lymphomas. *Cancer Immunol Res.* **7**:1318-1331.
- 478 14. Osawa M, Mine S, Ota S, Kato K, Sekizuka T, Kuroda M, Kataoka M,  
479 Fukumoto H, Sato Y, Kanno T, Hasegawa H, Ueda K, Fukayama M, Maeda T,  
480 Kanoh S, Kawana A, Fujikura Y, Katano H. 2016. Establishing and  
481 characterizing a new primary effusion lymphoma cell line harboring Kaposi's  
482 sarcoma-associated herpesvirus. *Infect Agent Cancer.* **11**:37.
- 483 15. Vieira J, O'Hearn PM. 2004. Use of the red fluorescent protein as a marker of  
484 Kaposi's sarcoma-associated herpesvirus lytic gene expression. *Virology.*  
485 **325**:225-240.
- 486 16. Sarkar S, Abujamra AL, Loew JE, Forman LW, Perrine SP, Faller DV. 2011.  
487 Histone deacetylase inhibitors reverse CpG methylation by regulating DNMT1  
488 through ERK signaling. *Anticancer Res.* **31**:2723-2732.
- 489 17. Greenblatt DY, Cayo M, Ning L, Jaskula-Sztul R, Haymart M, Kunnimalaiyaan  
490 M, Chen H. 2007. Suberoyl bishydroxamic acid inhibits cellular proliferation by  
491 inducing cell cycle arrest in carcinoid cancer cells. *J Gastrointest Surg.*  
492 **11**:1515-1520; discussion 1520.
- 493 18. Adler JT, Hottinger DG, Kunnimalaiyaan M, Chen H. 2008. Histone deacetylase  
494 inhibitors upregulate Notch-1 and inhibit growth in pheochromocytoma cells.  
495 *Surgery.* **144**:956-961; discussion 961-952.

- 496 19. Ning L, Greenblatt DY, Kunnimalaiyaan M, Chen H. 2008. Suberoyl  
497 bis-hydroxamic acid activates Notch-1 signaling and induces apoptosis in  
498 medullary thyroid carcinoma cells. *Oncologist*. **13**:98-104.
- 499 20. Xiao X, Ning L, Chen H. 2009. Notch1 mediates growth suppression of  
500 papillary and follicular thyroid cancer cells by histone deacetylase inhibitors.  
501 *Mol Cancer Ther*. **8**:350-356.
- 502 21. Li J, Zheng X, Gao M, Zhao J, Li Y, Meng X, Qian B, Li J. 2017. Suberoyl  
503 bis-hydroxamic acid activates Notch1 signaling and induces apoptosis in  
504 anaplastic thyroid carcinoma through p53. *Oncol Rep*. **37**:458-464.
- 505 22. Zhang XD, Gillespie SK, Borrow JM, Hersey P. 2004. The histone deacetylase  
506 inhibitor suberic bishydroxamate regulates the expression of multiple apoptotic  
507 mediators and induces mitochondria-dependent apoptosis of melanoma cells.  
508 *Mol Cancer Ther*. **3**:425-435.
- 509 23. Chen S, Dai Y, Pei XY, Grant S. 2009. Bim upregulation by histone deacetylase  
510 inhibitors mediates interactions with the Bcl-2 antagonist ABT-737: evidence for  
511 distinct roles for Bcl-2, Bcl-xL, and Mcl-1. *Mol Cell Biol*. **29**:6149-6169.
- 512 24. You BR, Park WH. 2010. Suberoyl bishydroxamic acid inhibits the growth of  
513 A549 lung cancer cells via caspase-dependent apoptosis. *Mol Cell Biochem*.  
514 **344**:203-210.
- 515 25. Yang X, Zhang N, Shi Z, Yang Z, Hu X. 2015. Histone deacetylase inhibitor  
516 suberoyl bis-hydroxamic acid suppresses cell proliferation and induces apoptosis  
517 in breast cancer cells. *Mol Med Rep*. **11**:2908-2912.
- 518 26. Bray SJ. 2006. Notch signalling: a simple pathway becomes complex. *Nat Rev*  
519 *Mol Cell Biol*. **7**:678-689.

- 520 27. Lan K, Choudhuri T, Murakami M, Kuppers DA, Robertson ES. 2006.  
521 Intracellular activated Notch1 is critical for proliferation of Kaposi's  
522 sarcoma-associated herpesvirus-associated B-lymphoma cell lines in vitro. *J*  
523 *Virol.* **80**:6411-6419.
- 524 28. Lan K, Murakami M, Choudhuri T, Kuppers DA, Robertson ES. 2006.  
525 Intracellular-activated Notch1 can reactivate Kaposi's sarcoma-associated  
526 herpesvirus from latency. *Virology.* **351**:393-403.
- 527 29. Autin P, Blanquart C, Fradin D. 2019. Epigenetic Drugs for Cancer and  
528 microRNAs: A Focus on Histone Deacetylase Inhibitors. *Cancers (Basel).* **11**.
- 529 30. Chen J, Ueda K, Sakakibara S, Okuno T, Parravicini C, Corbellino M,  
530 Yamanishi K. 2001. Activation of latent Kaposi's sarcoma-associated  
531 herpesvirus by demethylation of the promoter of the lytic transactivator. *Proc*  
532 *Natl Acad Sci U S A.* **98**:4119-4124.
- 533 31. Gunther T, Grundhoff A. 2010. The epigenetic landscape of latent Kaposi  
534 sarcoma-associated herpesvirus genomes. *PLoS Pathog.* **6**:e1000935.
- 535 32. Kenney SC. 2007. Reactivation and lytic replication of EBV. In A. Arvin, G. Campadelli-Fiume,  
536 E. Mocarski, P. S. Moore, B. Roizman, R. Whitley, and K. Yamanishi (ed.), *Human*  
537 *Herpesviruses: Biology, Therapy, and Immunoprophylaxis*, Cambridge.
- 538 33. Feng WH, Hong G, Delecluse HJ, Kenney SC. 2004. Lytic induction therapy for  
539 Epstein-Barr virus-positive B-cell lymphomas. *J Virol.* **78**:1893-1902.
- 540 34. Jacobs SR, Damania B. 2011. The viral interferon regulatory factors of KSHV:  
541 immunosuppressors or oncogenes? *Front Immunol.* **2**:19.
- 542 35. Munoz-Fontela C, Marcos-Villar L, Gallego P, Arroyo J, Da Costa M, Pomeranz  
543 KM, Lam EW, Rivas C. 2007. Latent protein LANA2 from Kaposi's



- 544 sarcoma-associated herpesvirus interacts with 14-3-3 proteins and inhibits  
545 FOXO3a transcription factor. *J Virol.* **81**:1511-1516.
- 546 36. Kati S, Hage E, Mynarek M, Ganzenmueller T, Indenbirken D, Grundhoff A,  
547 Schulz TF. 2015. Generation of high-titre virus stocks using BrK.219, a B-cell  
548 line infected stably with recombinant Kaposi's sarcoma-associated herpesvirus. *J*  
549 *Virol Methods.* **217**:79-86.
- 550 37. Fakhari FD, Dittmer DP. 2002. Charting latency transcripts in Kaposi's  
551 sarcoma-associated herpesvirus by whole-genome real-time quantitative PCR. *J*  
552 *Virol.* **76**:6213-6223.
- 553 38. Yanagisawa Y, Sato Y, Asahi-Ozaki Y, Ito E, Honma R, Imai J, Kanno T, Kano  
554 M, Akiyama H, Sata T, Shinkai-Ouchi F, Yamakawa Y, Watanabe S, Katano H.  
555 2006. Effusion and solid lymphomas have distinctive gene and protein  
556 expression profiles in an animal model of primary effusion lymphoma. *J Pathol.*  
557 **209**:464-473.
- 558 39. Kanno T, Uehara T, Osawa M, Fukumoto H, Mine S, Ueda K, Hasegawa H,  
559 Katano H. 2015. Fumagillin, a potent angiogenesis inhibitor, induces Kaposi  
560 sarcoma-associated herpesvirus replication in primary effusion lymphoma cells.  
561 *Biochem Biophys Res Commun.* **463**:1267-1272.
- 562 40. Okuno T, Jiang YB, Ueda K, Nishimura K, Tamura T, Yamanishi K. 2002.  
563 Activation of human herpesvirus 8 open reading frame K5 independent of  
564 ORF50 expression. *Virus Res.* **90**:77-89.
- 565 41. Katano H, Sato Y, Kurata T, Mori S, Sata T. 1999. High expression of  
566 HHV-8-encoded ORF73 protein in spindle-shaped cells of Kaposi's sarcoma. *Am*  
567 *J Pathol.* **155**:47-52.

- 568 42. Katano H, Sato Y, Kurata T, Mori S, Sata T. 2000. Expression and localization of  
569 human herpesvirus 8-encoded proteins in primary effusion lymphoma, Kaposi's  
570 sarcoma, and multicentric Castleman's disease. *Virology*. **269**:335-344.
- 571 43. Lu F, Zhou J, Wiedmer A, Madden K, Yuan Y, Lieberman PM. 2003. Chromatin  
572 remodeling of the Kaposi's sarcoma-associated herpesvirus ORF50 promoter  
573 correlates with reactivation from latency. *J Virol*. **77**:11425-11435.
- 574 44. Chen J, Ye F, Xie J, Kuhne K, Gao SJ. 2009. Genome-wide identification of  
575 binding sites for Kaposi's sarcoma-associated herpesvirus lytic switch protein,  
576 RTA. *Virology*. **386**:290-302.
- 577 45. de Hoon MJ, Imoto S, Nolan J, Miyano S. 2004. Open source clustering  
578 software. *Bioinformatics*. **20**:1453-1454.
- 579 46. Saldanha AJ. 2004. Java Treeview--extensible visualization of microarray data.  
580 *Bioinformatics*. **20**:3246-3248.
- 581
- 582

583 **Table 1.** A summary of transcriptome reads mapping to the KSHV genome.

584

| <b>Cell type</b> | <b>Treatment</b> | <b>Total reads</b> | <b>KSHV mapped reads</b> | <b>Percentage of total (%)</b> |
|------------------|------------------|--------------------|--------------------------|--------------------------------|
| <b>BCBL-1</b>    | DMSO             | 1,304,979          | 8,522                    | 0.65                           |
|                  | TPA              | 904,733            | 27,672                   | 3.06                           |
|                  | SBHA             | 657,182            | 296,867                  | 45.17                          |
| <b>SPEL</b>      | DMSO             | 756,210            | 3,076                    | 0.41                           |
|                  | TPA              | 912,306            | 25,383                   | 2.78                           |
|                  | SBHA             | 628,538            | 275,229                  | 43.79                          |

585

586

587 **Fig. 1.** KSHV reactivation by SBHA. (A) Flow cytometry of RFP expression in  
588 rKSHV.219-infected Burkitt lymphoma cells, BJAB.219 and Raji.219. The cells were  
589 analyzed by flow cytometry 36 hours after addition of various concentration of SBHA  
590 to culture medium. (B) Dose-response relationship between SBHA concentration and  
591 RFP positivity in BJAB.219 and Raji.219 cells. (C) Real-time RT-PCR analysis for  
592 KSHV-encoded RTA (left) and vIL-6 (right) mRNA expression in three KSHV-positive  
593 PEL cell lines treated with each drug for 48 hours. The average from three independent  
594 experiments is shown and error bars indicate the standard deviation. (D) Western blot  
595 analysis for KSHV-encoded proteins, RTA, vIL-6 and LANA-1. The cells were treated  
596 with each drug for 48 hours. The arrowhead indicates LANA-1. DMSO: dimethyl  
597 sulfoxide, TPA: 12-*O*-tetradecanoylphorbol-13-acetate, Pano: panobinostat, SBHA:  
598 Suberoyl bis-hydroxamic acid, NaB: sodium butyrate. .

599

600 **Fig. 2.** KSHV-encoded gene expression profile of SBHA treated PEL cell lines. The  
601 heatmap was generated from the results of the KSHV real-time PCR array. Red and  
602 green colors indicate upregulation and downregulation of gene transcription,  
603 respectively. Gray color indicates missing values.

604

605 **Fig. 3.** Transcriptome analysis of KSHV-encoded genes in SPEL cells. (A) Ring image  
606 for coverage of reads mapped to KSHV genome. Read coverage of DMSO (violet), TPA  
607 (green) or SBHA (red)-treated SPEL cells mapped to KSHV genome (GenBank  
608 accession no. AP017458) are shown. Maximum coverages in the image of DMSO, TPA  
609 and SBHA are 200, 1500, and 5000, respectively. Blue color in K7 indicates over the  
610 maximum reads. (B) Read coverage of SPEL cells in K7 (left), vIRF1 (center) and

611 latent gene clusters (right).

612

613 **Fig. 4.** Epigenetic effects of SBHA on PEL cells. (A, B) ChIP assay for RTA (A) and  
614 vIL-6 (B) promoter. Chromatin samples were reacted with the antibody against  
615 modified histones shown at the top of each panels. The average from three independent  
616 experiments is shown and error bar indicates standard deviation. (C) Bisulfite  
617 sequencing of RTA promoter. Six clones from each cell were subjected to analysis.  
618 Closed circles indicate methylated CpG sites, while open ones indicate unmethylated  
619 CpG sites. The position relative to the transcription start site of RTA is indicated above  
620 the panel.

621

622 **Fig. 5.** SBHA induced apoptosis in PEL cells. (A) Cell viability after drug treatment for  
623 48 hours determined by trypan blue stain. (B) Dose-response relationship between  
624 SBHA concentration and cell viability. (C, D) XTT assay after drug treatment for 48  
625 hours. Cell proliferation ratio was compared among TPA and several HDAC inhibitors  
626 (C), and dose-response relationship between SBHA concentration and cell growth was  
627 determined (D). The average from three independent experiments is shown and error  
628 bar indicates the standard deviation. (E) IC<sub>50</sub> of each drug against various cell lines.  
629 KSHV and EBV status are shown to the left. (F) Flow cytometry of annexin V assay.  
630 Fluorescence of FITC-labeled annexin V and PI were measured following 24 hours  
631 exposure to various concentration of SBHA. The data from control (DMSO-treated)  
632 cells and SBHA-treated (1 mM) cells are shown. (G) Dose-response relationship  
633 between SBHA concentration and apoptosis of PEL cells determined by annexin V  
634 assay.

635

636 **Fig. 6.** Activation of the mitochondrial pathway of apoptosis, induced by SBHA in PEL  
637 cells. PEL cells were treated with SBHA for 24 or 48 hours. Protein samples from BJAB,  
638 Jurkat and MOLT-4 cells were applied as positive control with GAPDH as loading  
639 control. White arrowheads indicate uncleaved caspases or BimL, and black arrowheads  
640 indicate cleaved caspases or BimS.

641

642 **Fig. 7.** Notch1 signaling was not activated by SBHA in PEL cells. Western blot analysis  
643 for the transmembrane/intracellular region of Notch1 (NTM) and its active form,  
644 Notch1 intracellular domain (NICD), is shown. PEL cells were treated with SBHA for  
645 24 or 48 hours. Protein samples from BJAB, Jurkat and MOLT-4 cells were applied as  
646 positive control with GAPDH as loading control. The white arrowhead indicates NTM  
647 and black arrowheads indicate NICD.

648

649 **Fig. 8.** Schematic diagram for effect of SBHA in PEL cells. SBHA induces histone  
650 acetylation on promoter of various genes such as KSHV-encoded RTA and proapoptotic  
651 factors. Transactivation of target genes results in KSHV reactivation and apoptosis.

652

653

654

655 **Supplementary data**

656

657 **Sup Fig. 1.** Alteration of KSHV-encoded gene expression induced by SBHA. PEL cells  
658 were treated with SBHA for 48 hours and RNA samples were subjected to KSHV  
659 real-time PCR array to determine expression profiles of KSHV-encoded genes. The  
660 copy number of each transcript was normalized to that of GAPDH and the ratio to the  
661 value of untreated cells is shown.

662

663 **Sup Fig. 2.** Transcriptome analysis of KSHV-encoded genes in BCBL-1 cells. (A) Ring  
664 image for coverage of reads mapped to KSHV genome. Read coverage of DMSO  
665 (violet), TPA (green) or SBHA (red)-treated BCBL-1 cells mapped to KSHV genome  
666 (GenBank accession no. NC\_003409) are shown. Maximum coverages in the image of  
667 DMSO, TPA and SBHA are 500, 2000, and 15,000, respectively. Blue color in K7  
668 indicates over the maximum reads. (B) Read coverage of BCBL-1 cells in K7 (left),  
669 vIRF (center) and latent gene clusters (right). Coverage of SBHA (top), TPA (2nd), and  
670 DMSO (3rd)-treated cells are shown. The lowest column indicates coding sequences of  
671 open reading frame.

Fig. 1

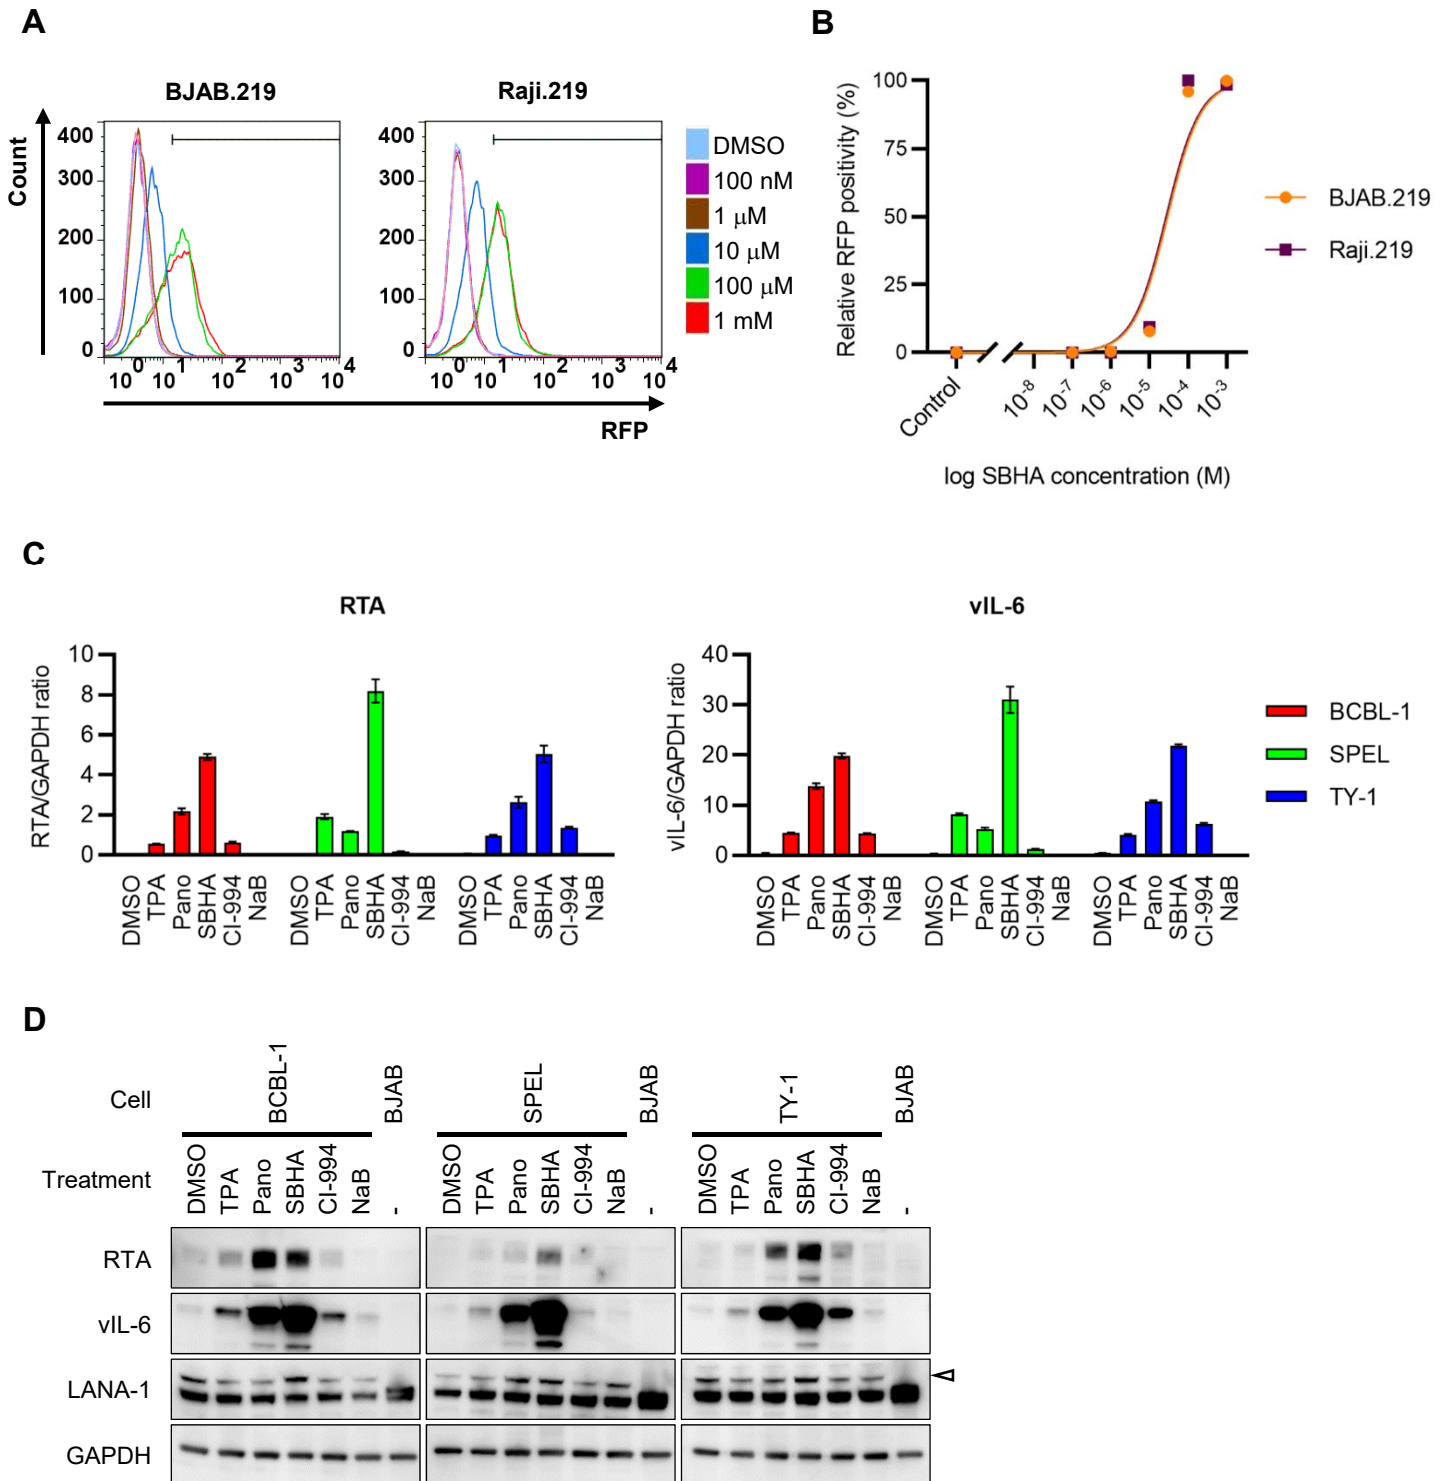



Fig. 2

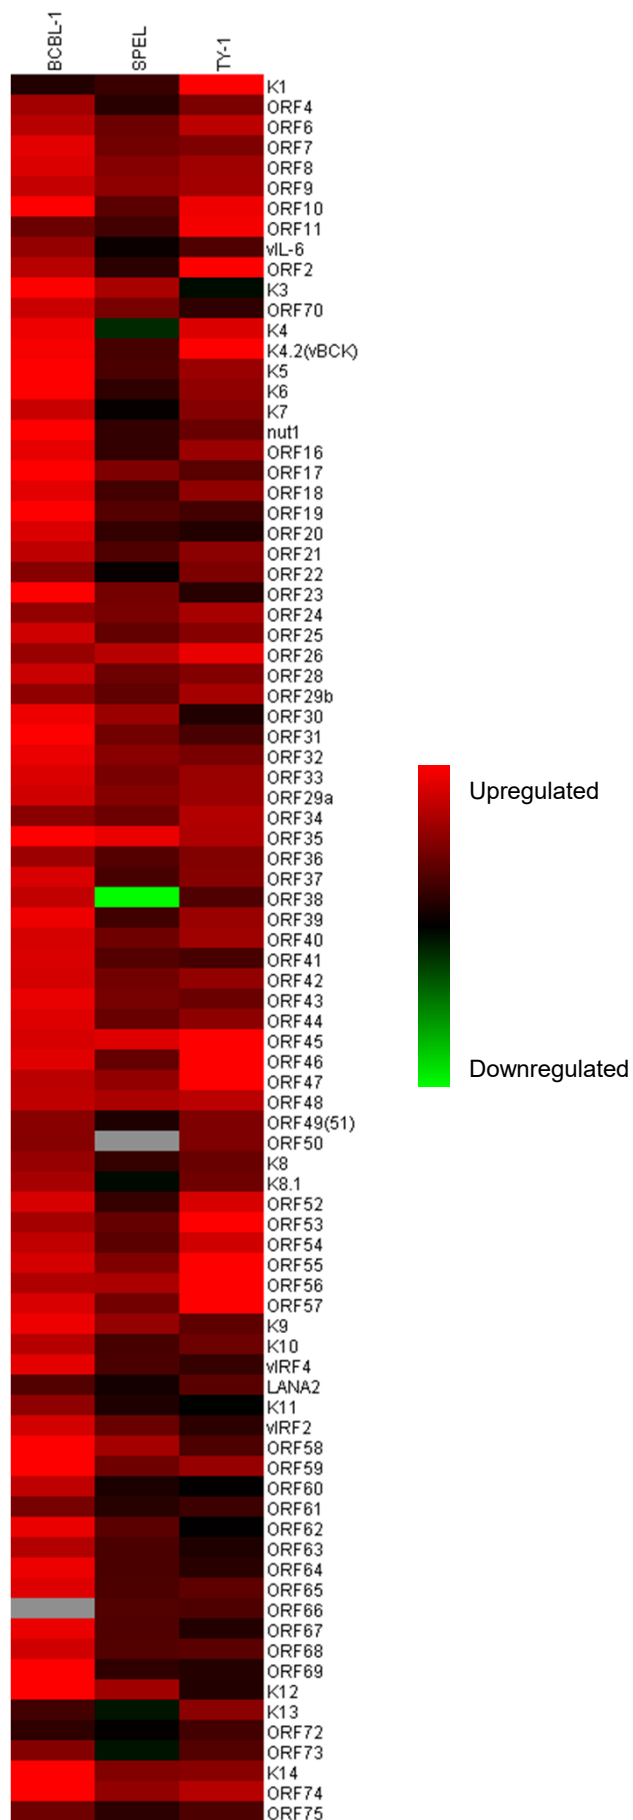

Fig. 3

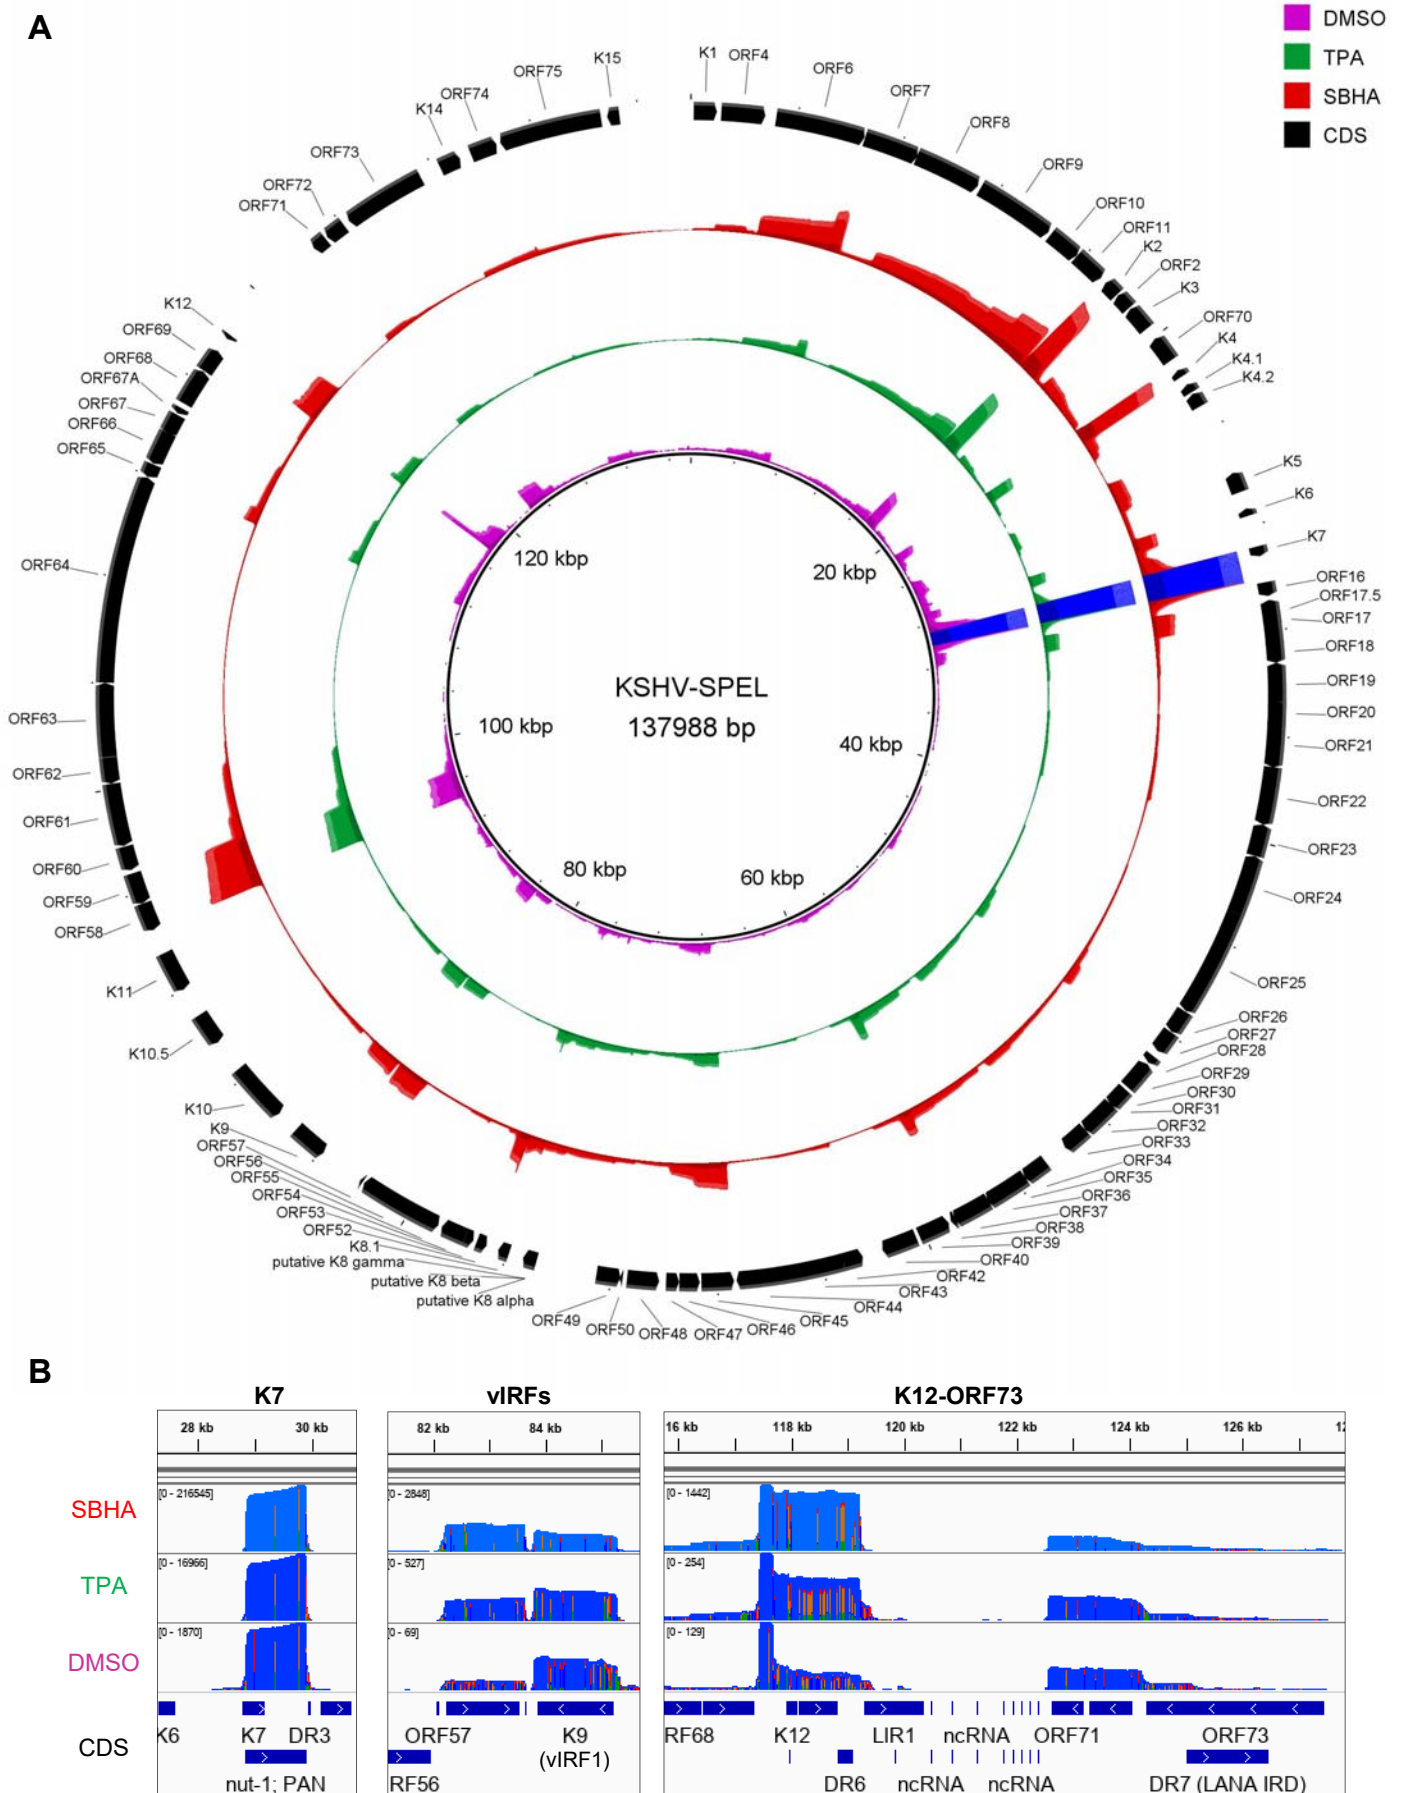

## Fig. 4

### A: RTA

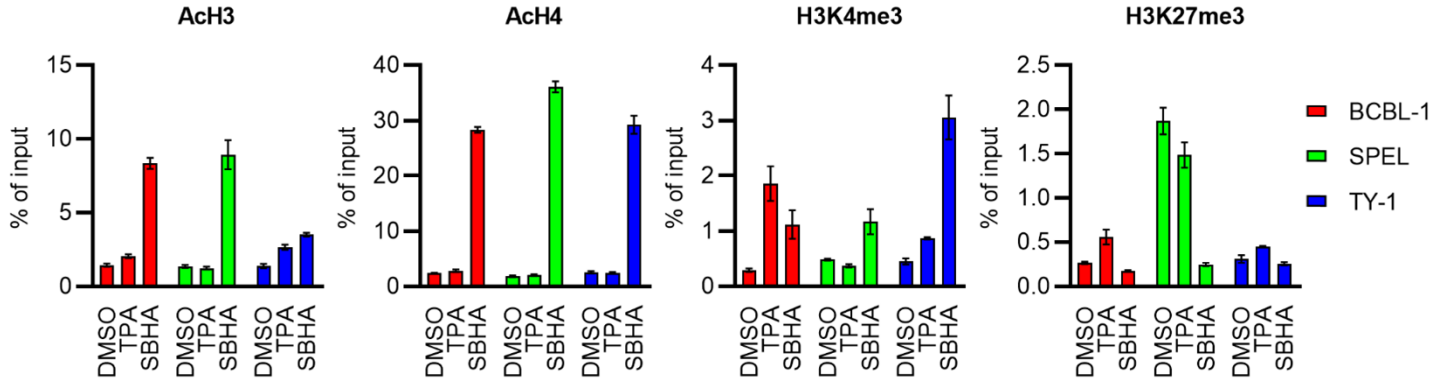

### B: vIL-6

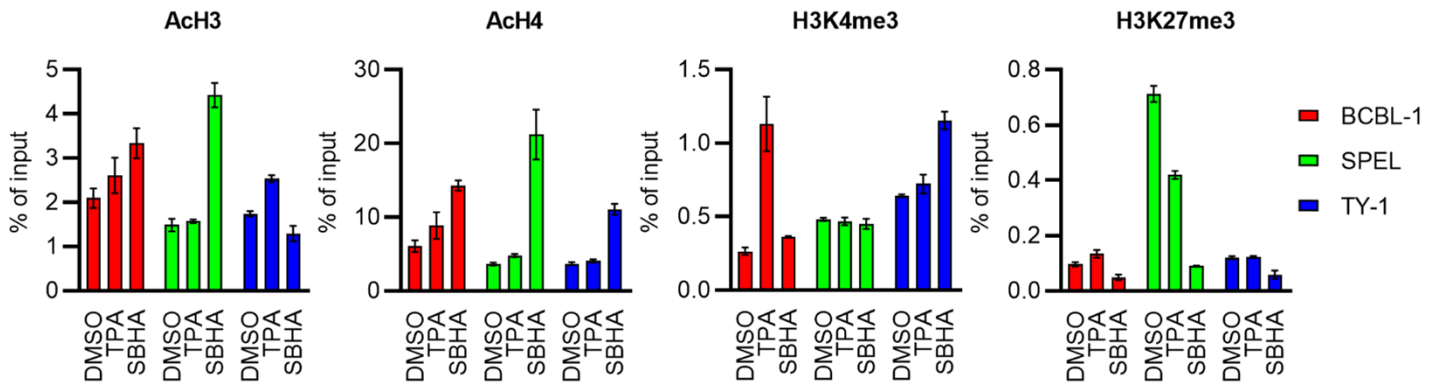

### C

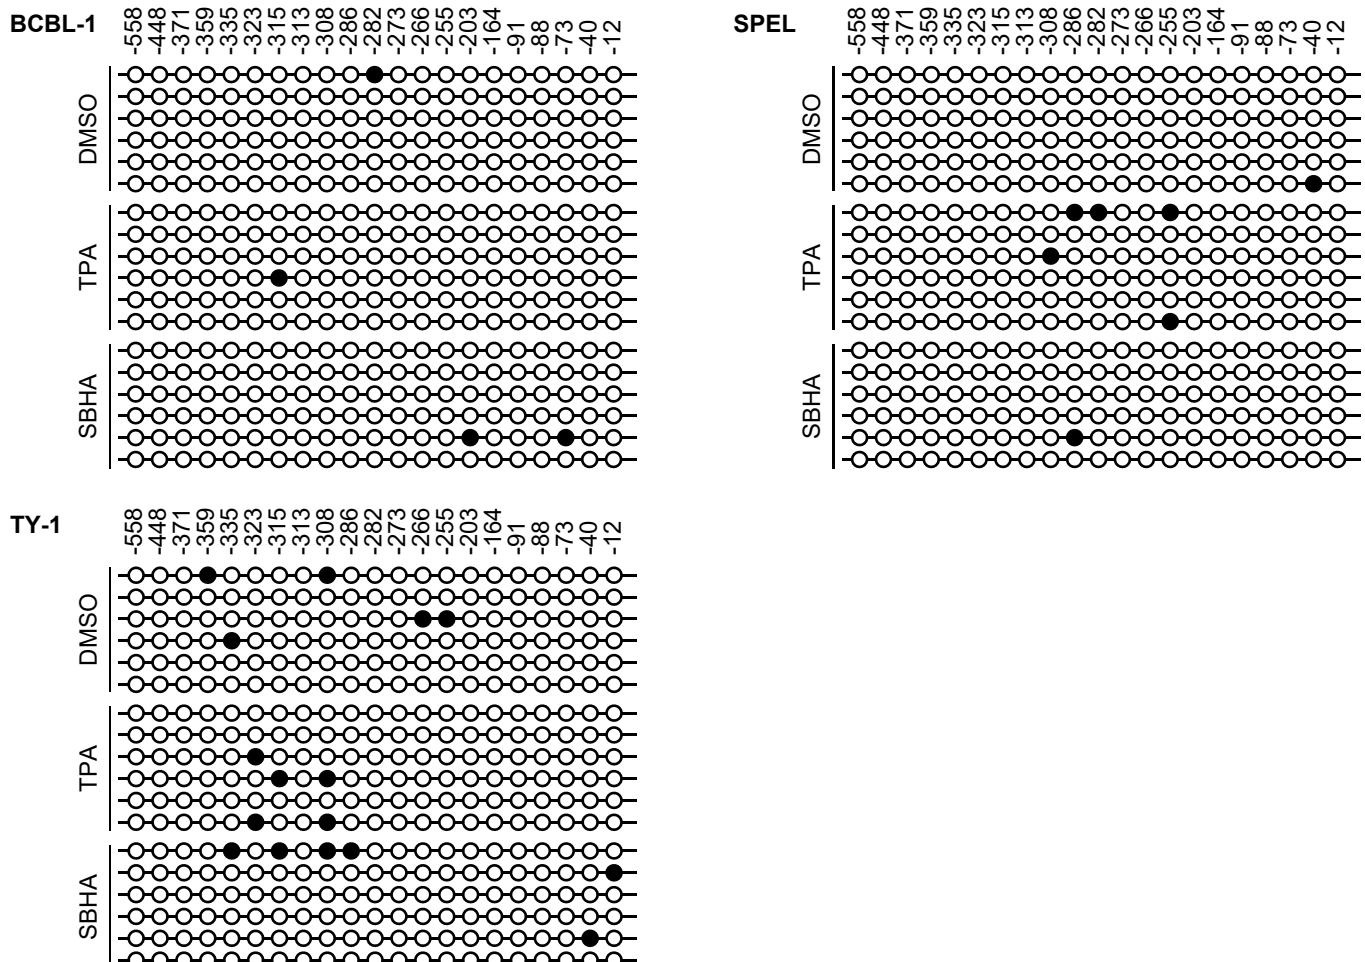

Fig. 5

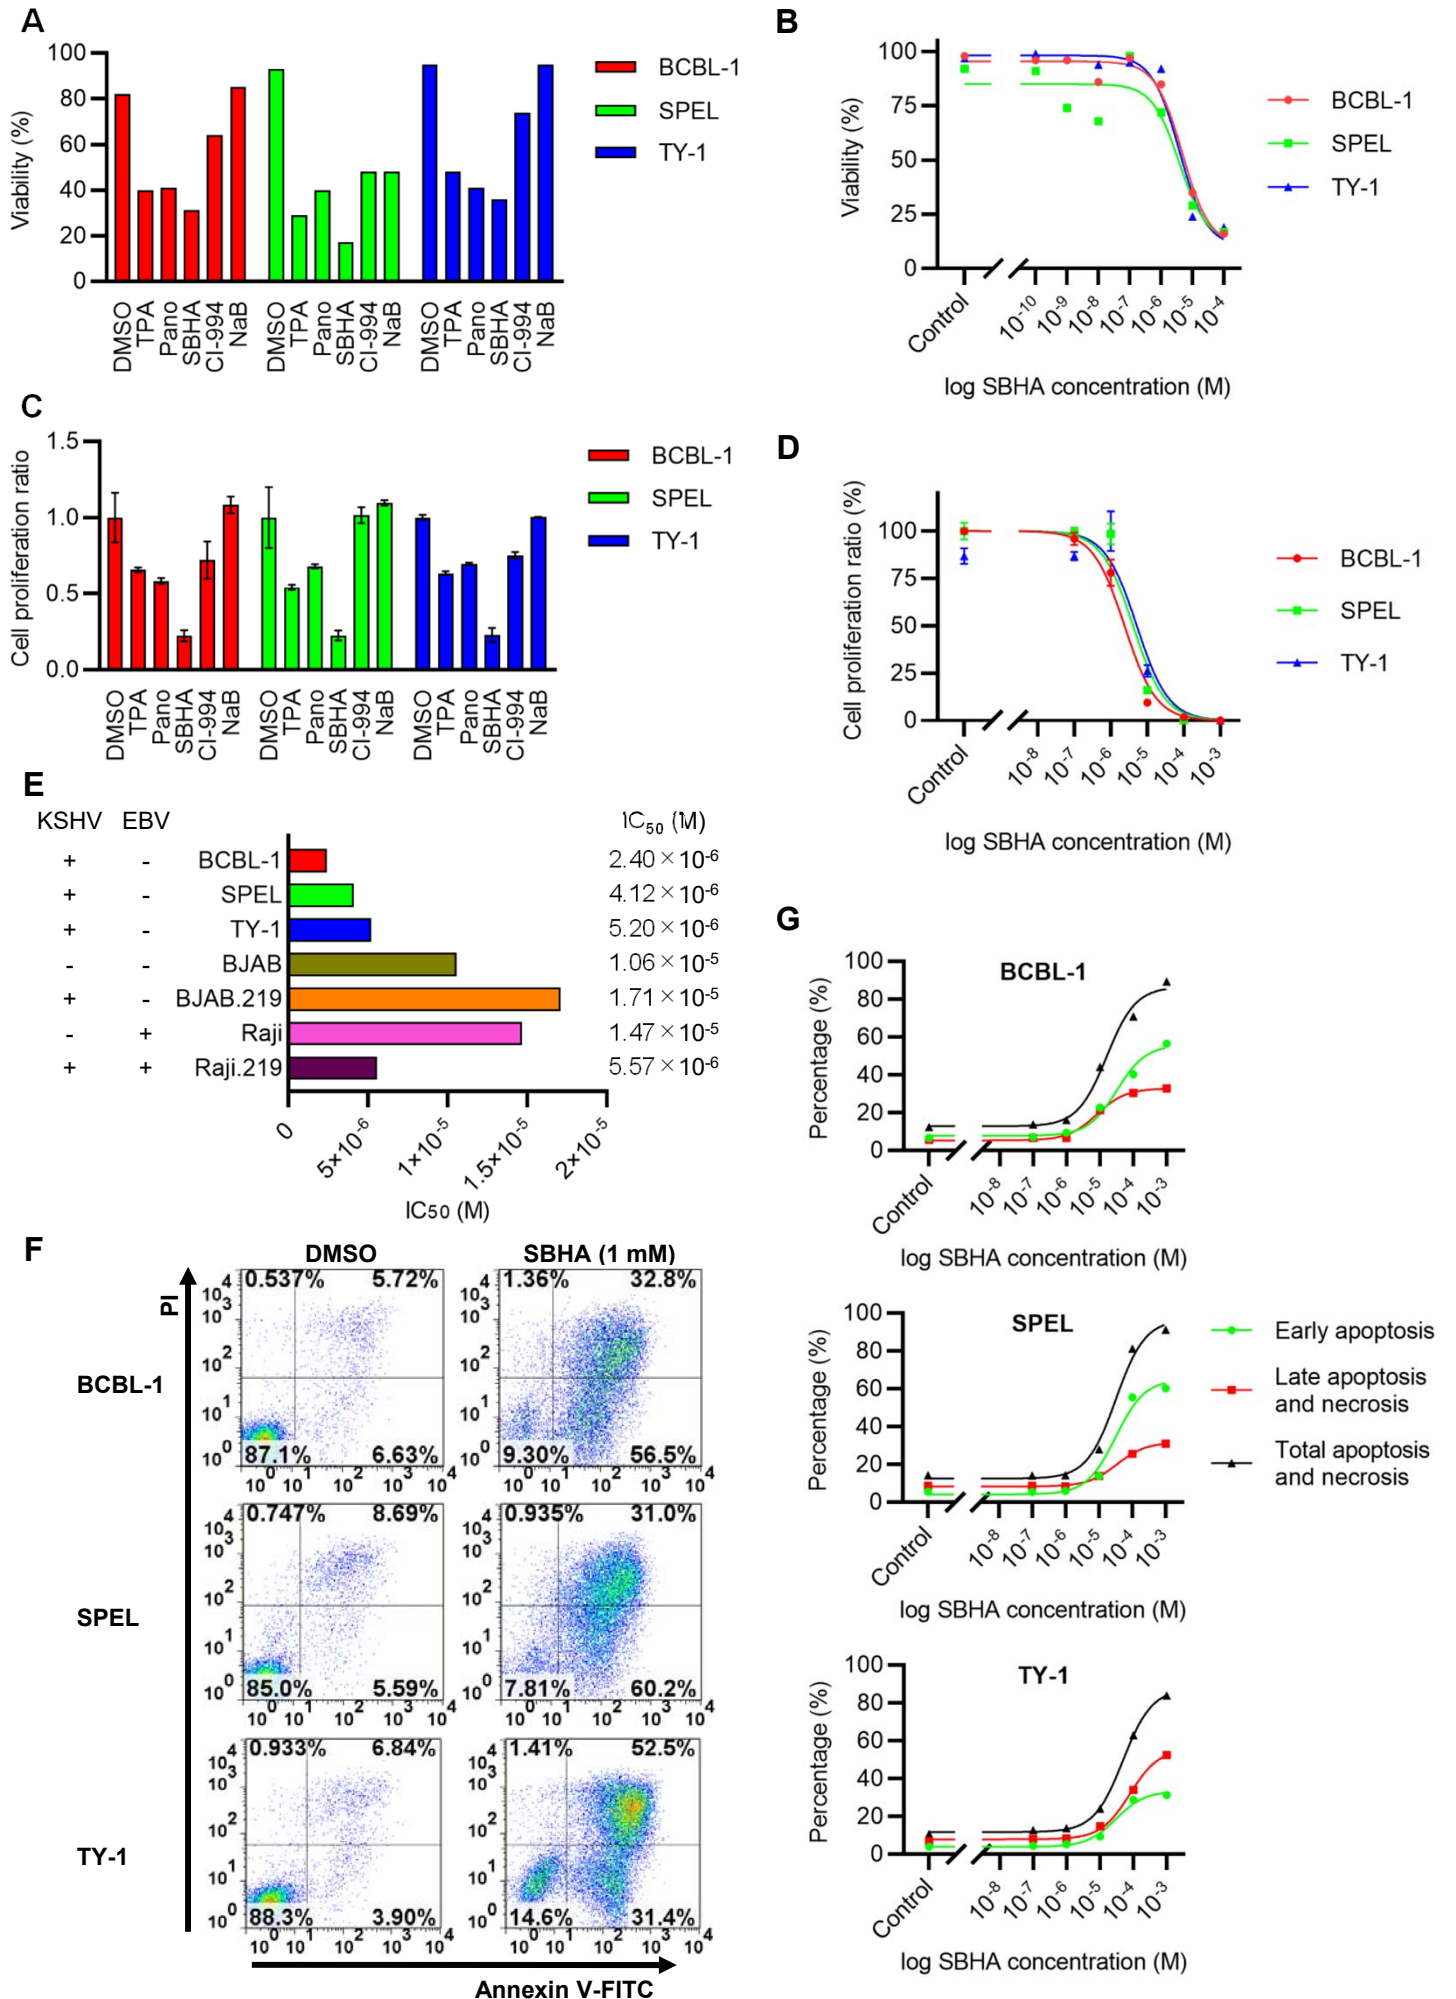



Fig. 7

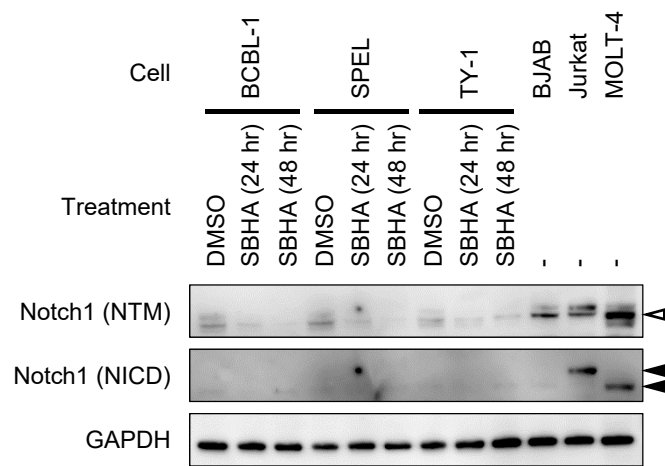

Fig. 8

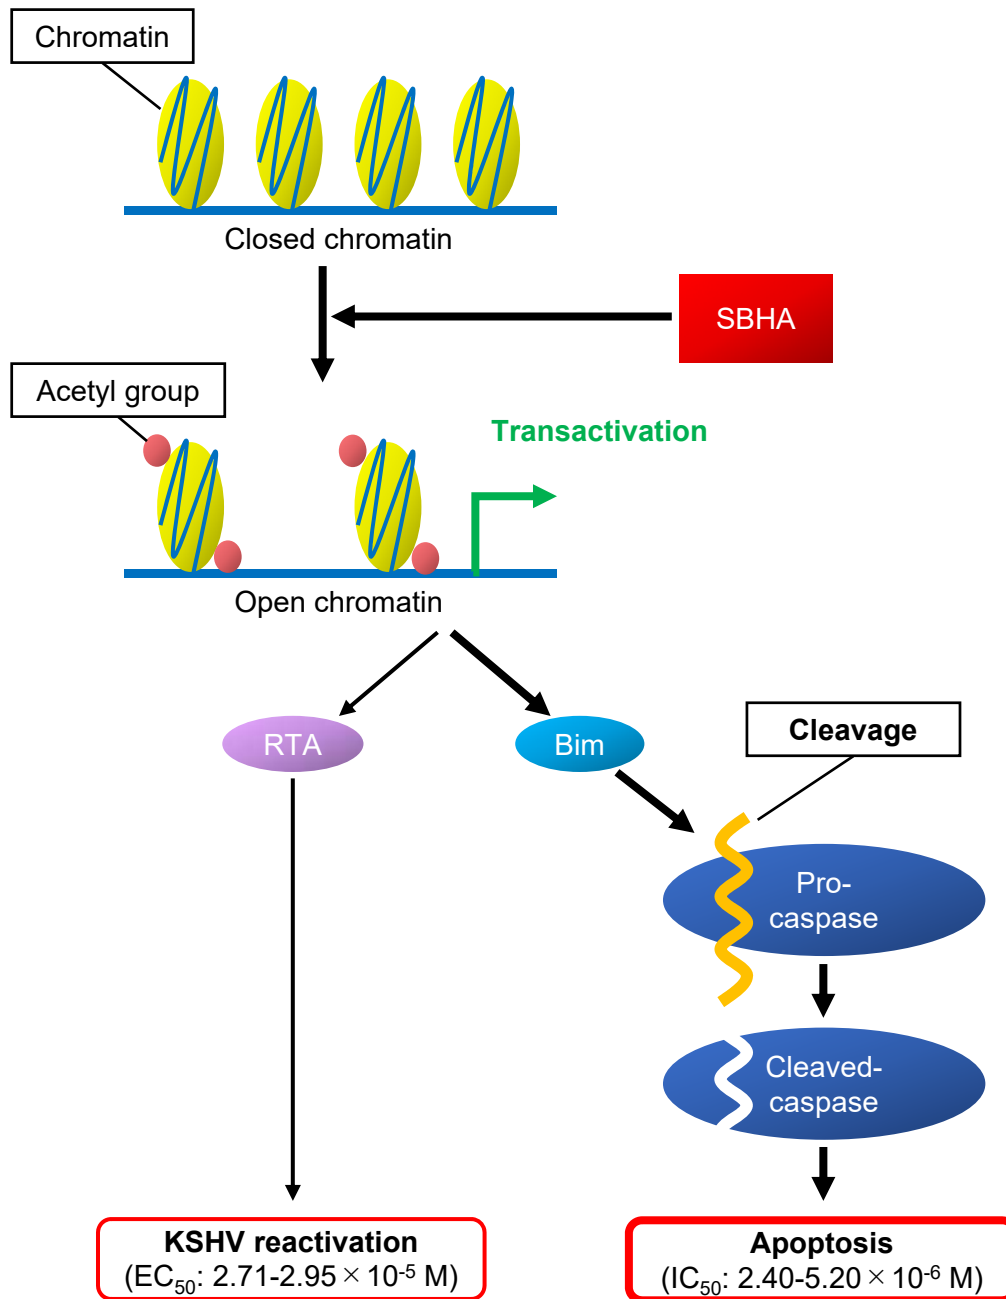

## Sup. Fig. 1

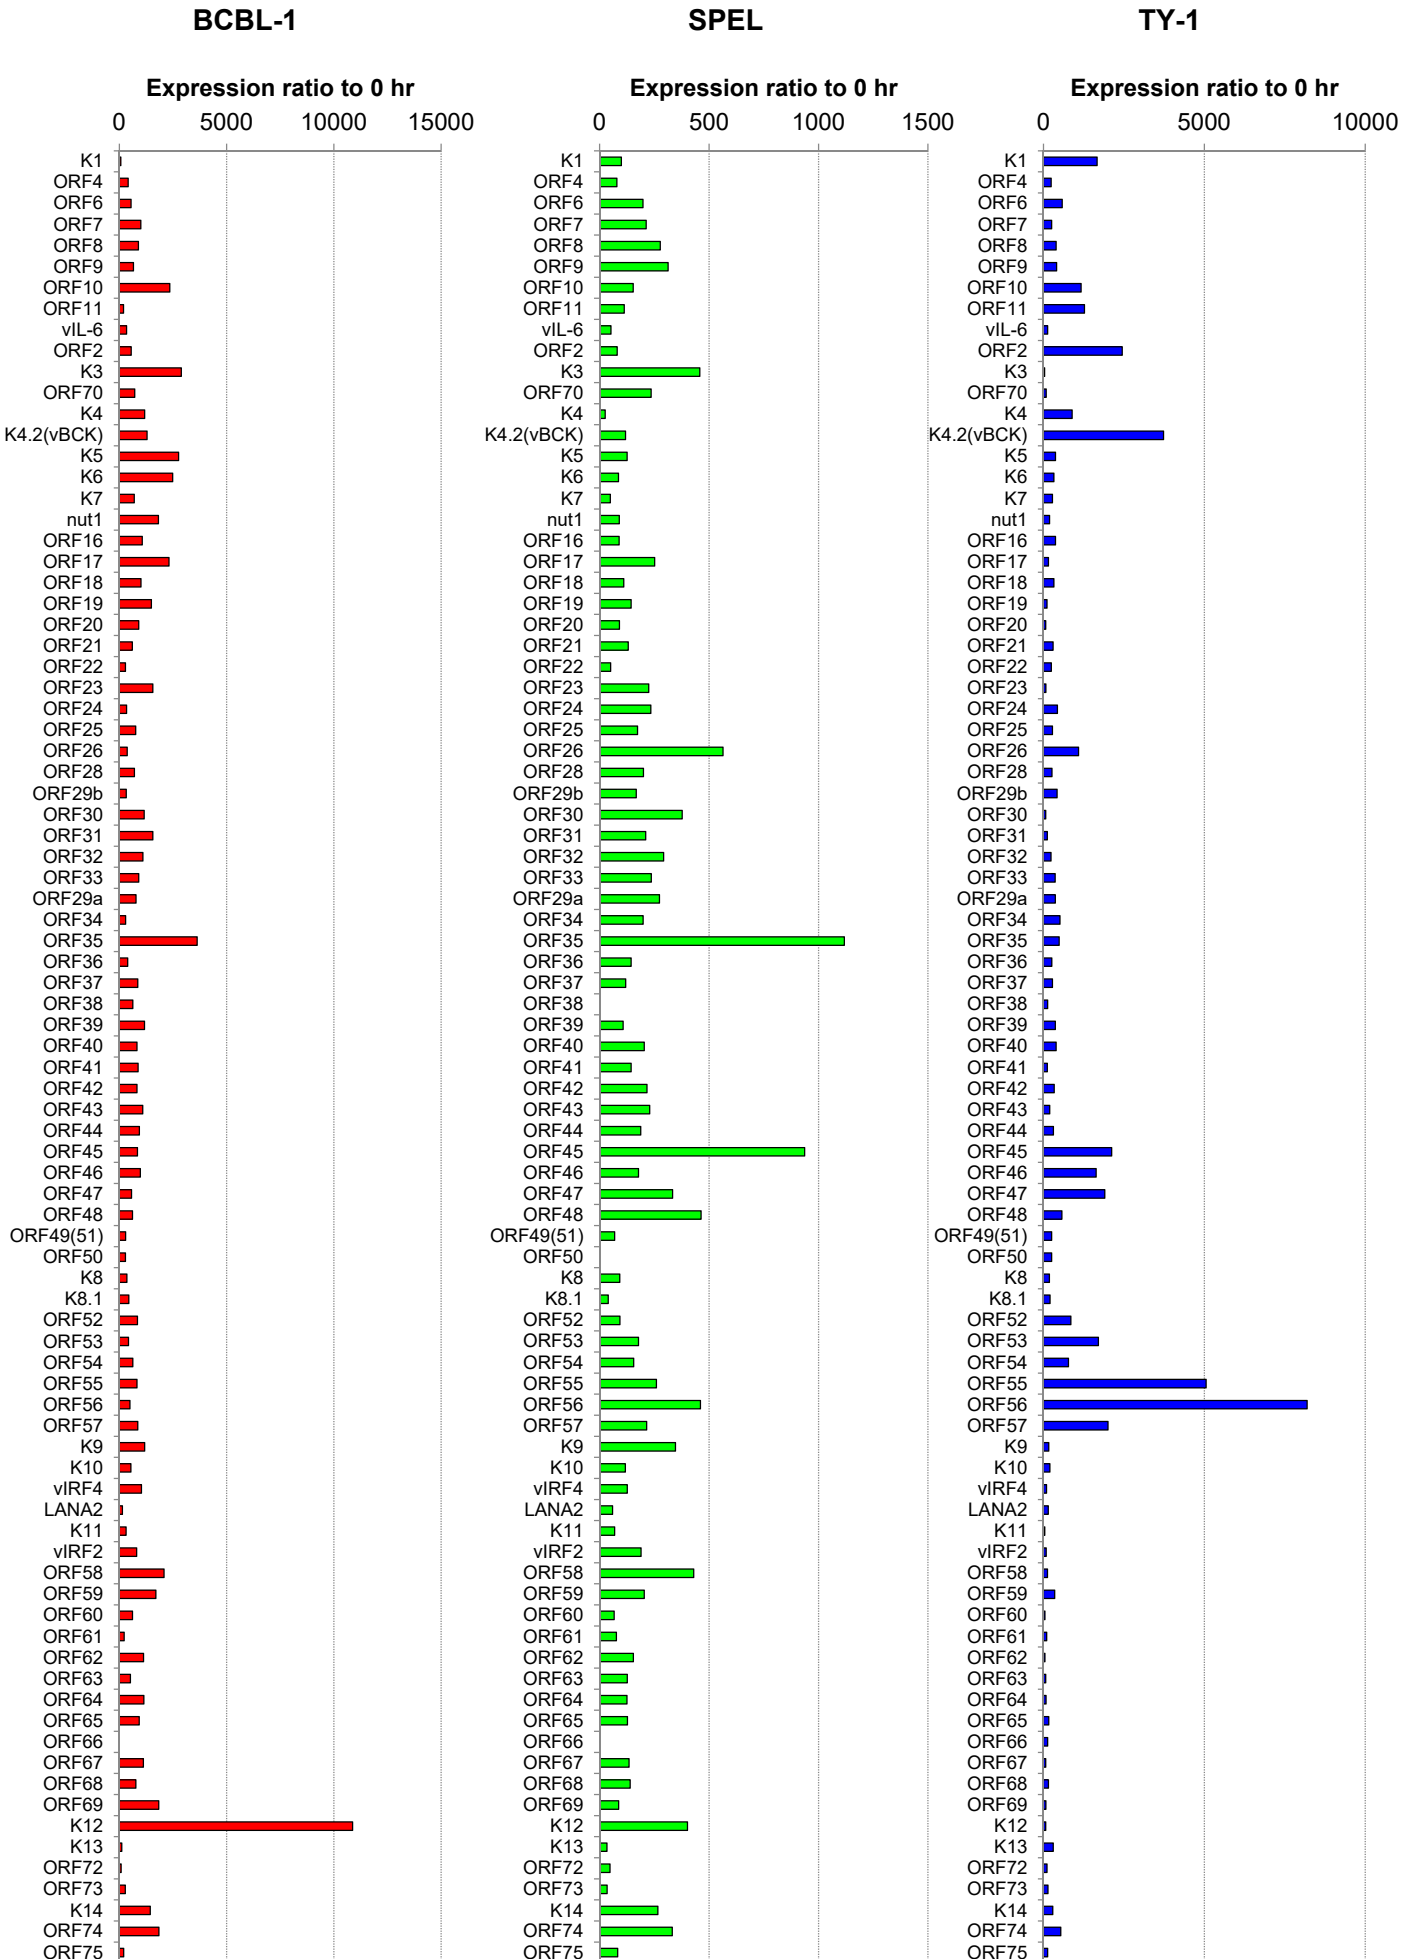



## Sup. Fig. 2

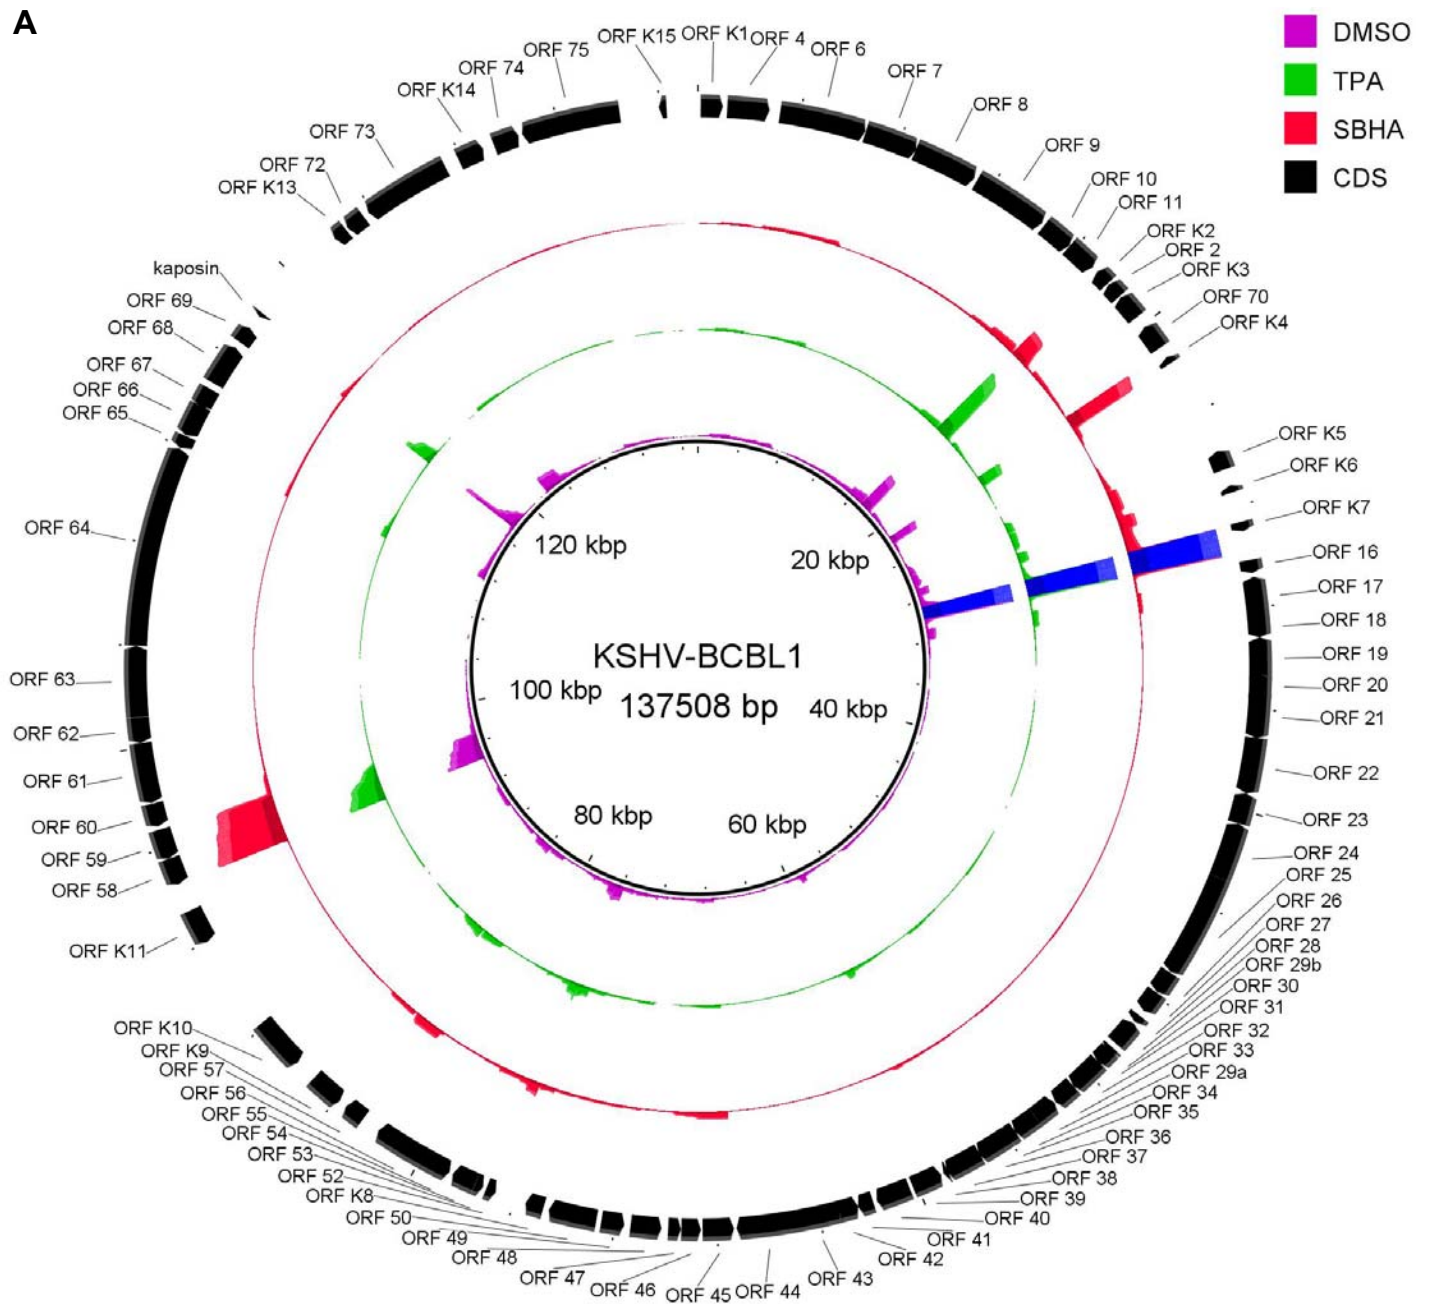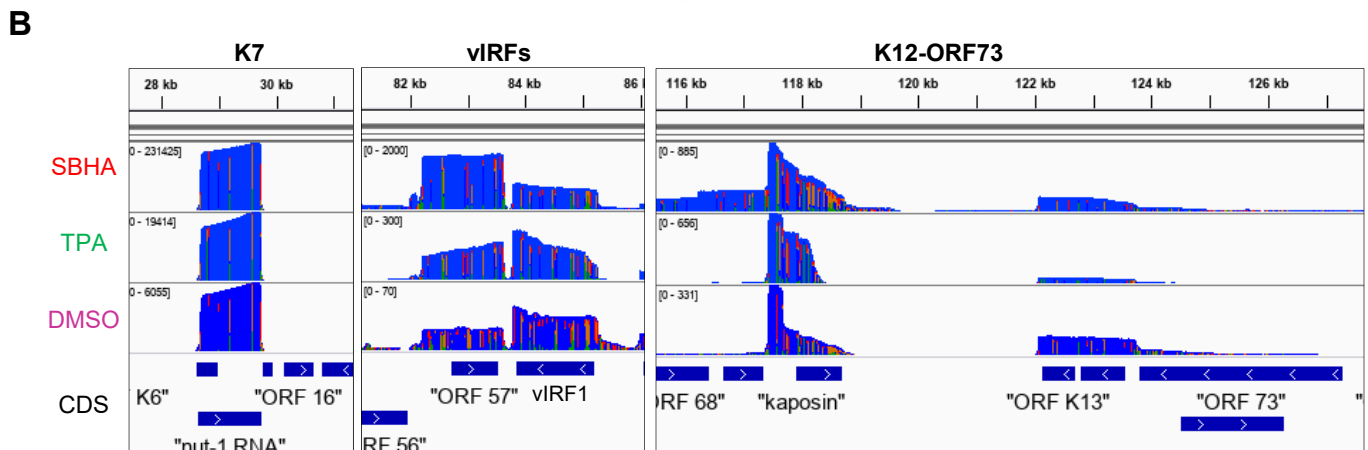

Source: https://www.biorxiv.org/content/10.1101/2020.09.08.288837v1.full.pdf
